# Supplementary material for: Understanding Functional Redundancy and Promiscuity of Multidrug Transporters in E. coli under Lipophilic Cation Stress
Source: MDPI journal article supplement (doi:10.3390/membranes12121264), 2022-12-14

eMRef\_T1F76I1

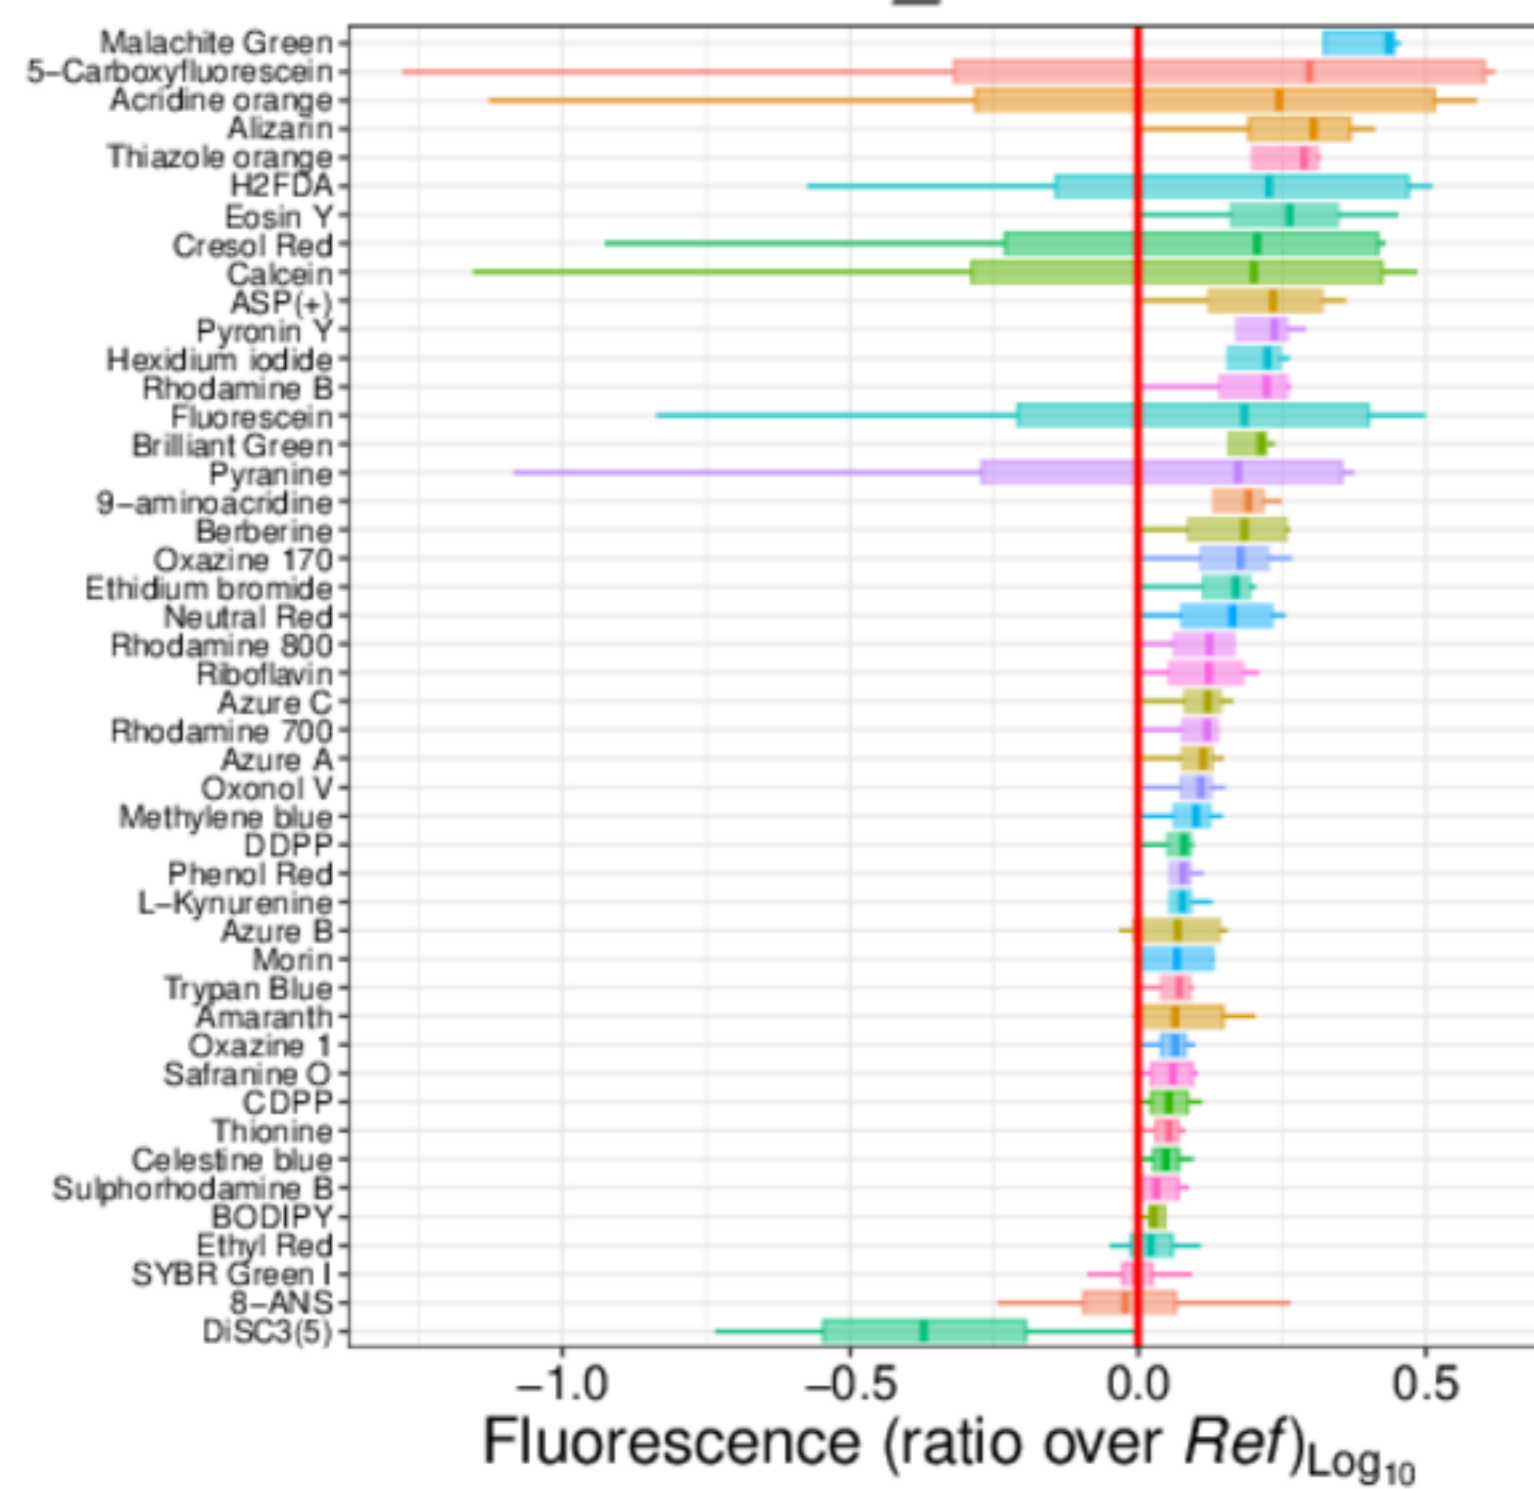

eMRef\_T1F76I2

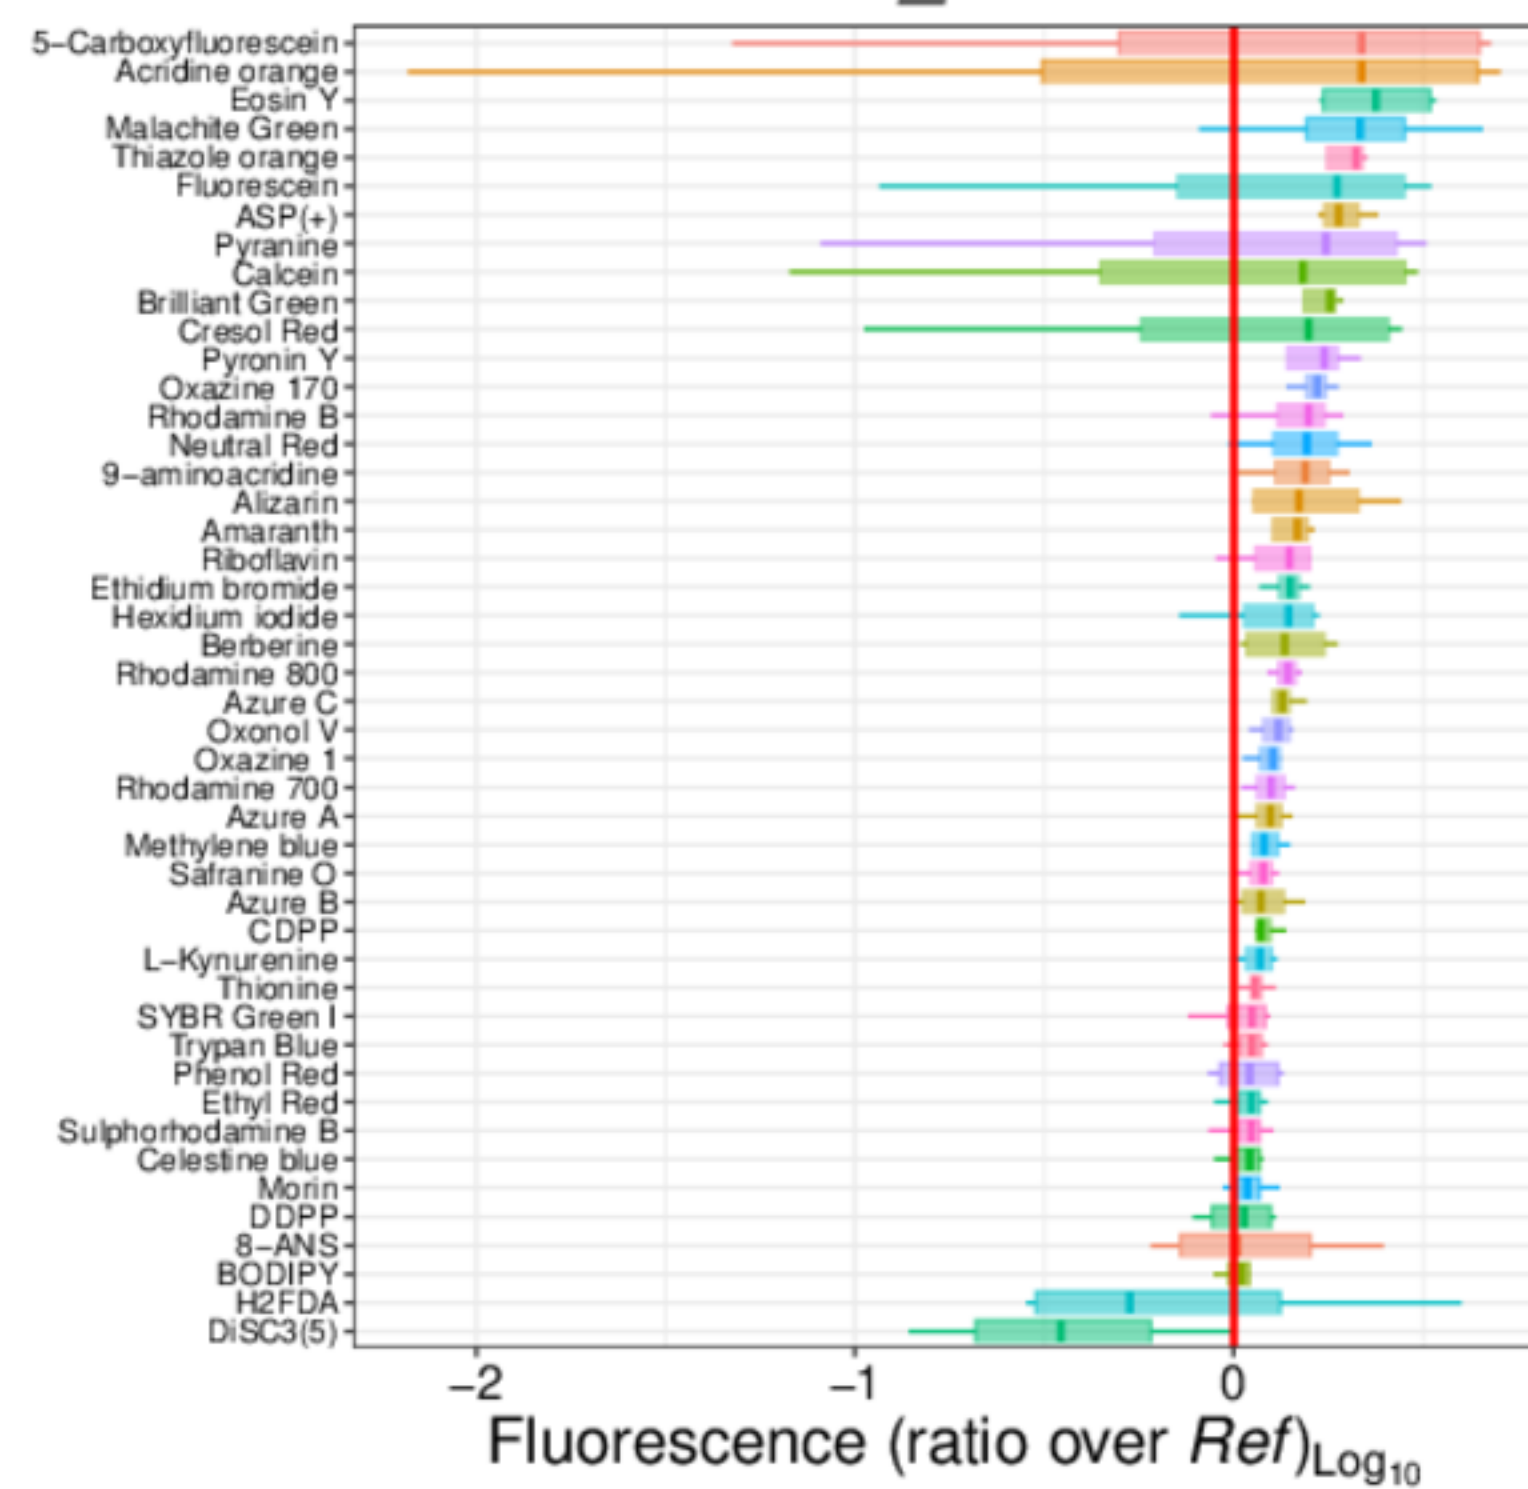

eMRef\_T2F63I1

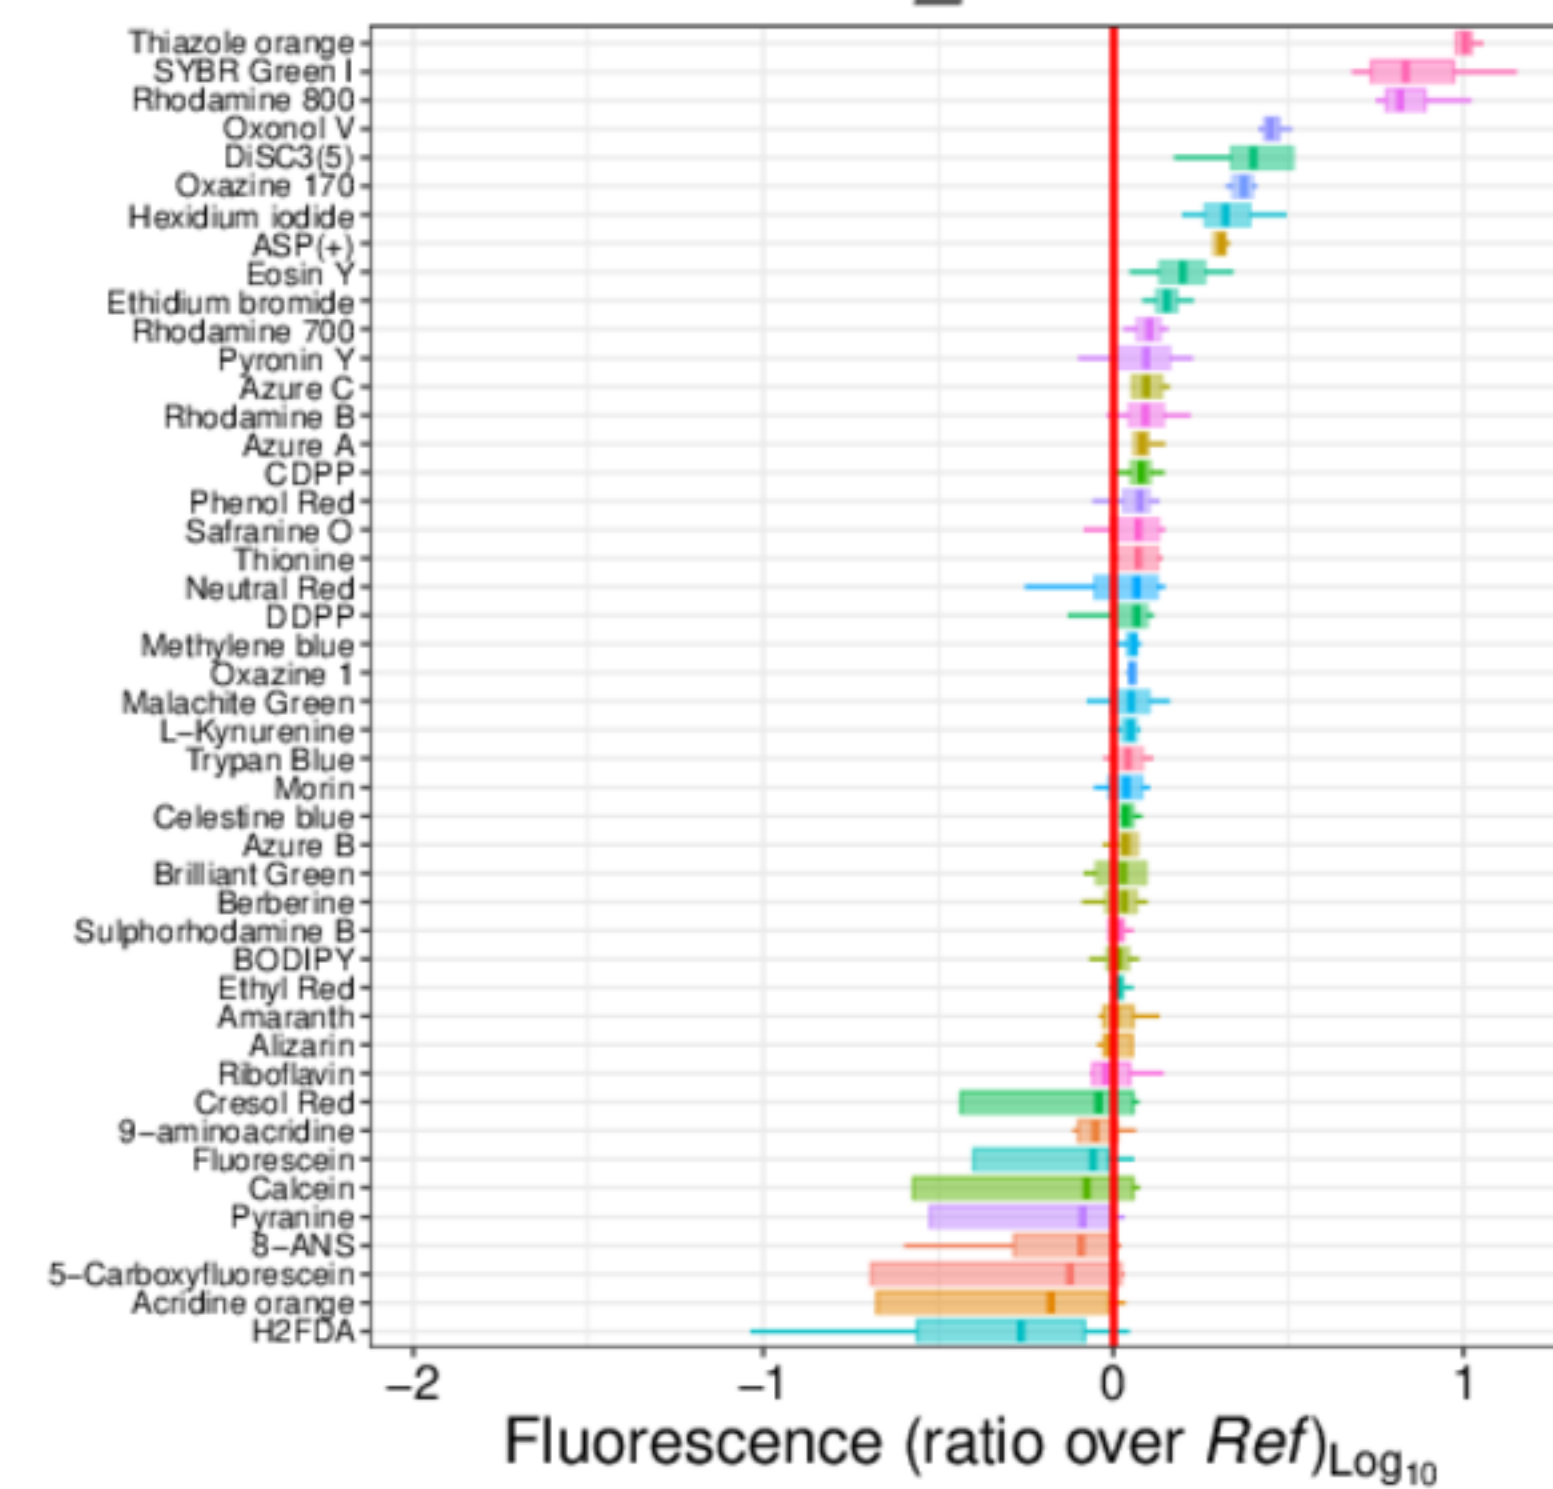

eMRef\_T2F63I2

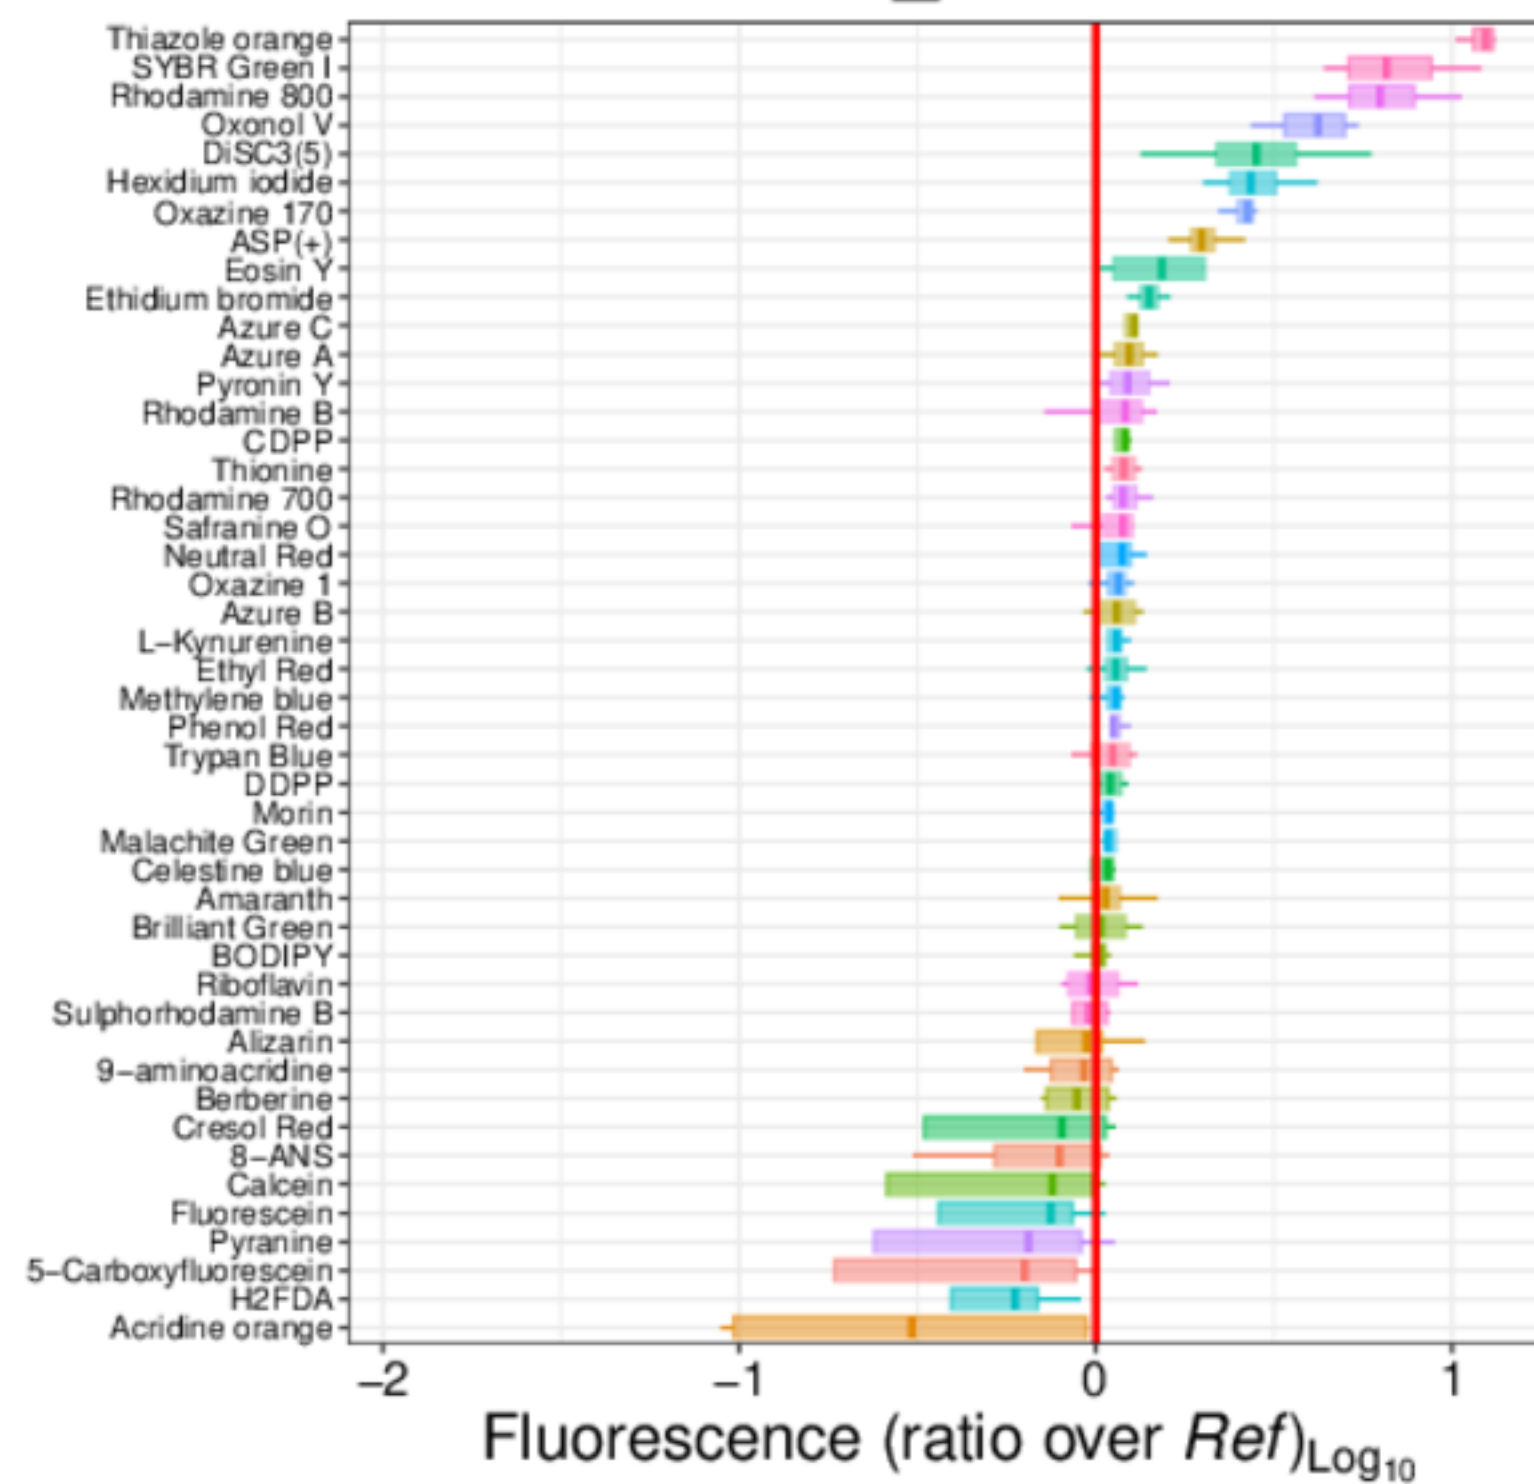

eMRef\_T3F81I1

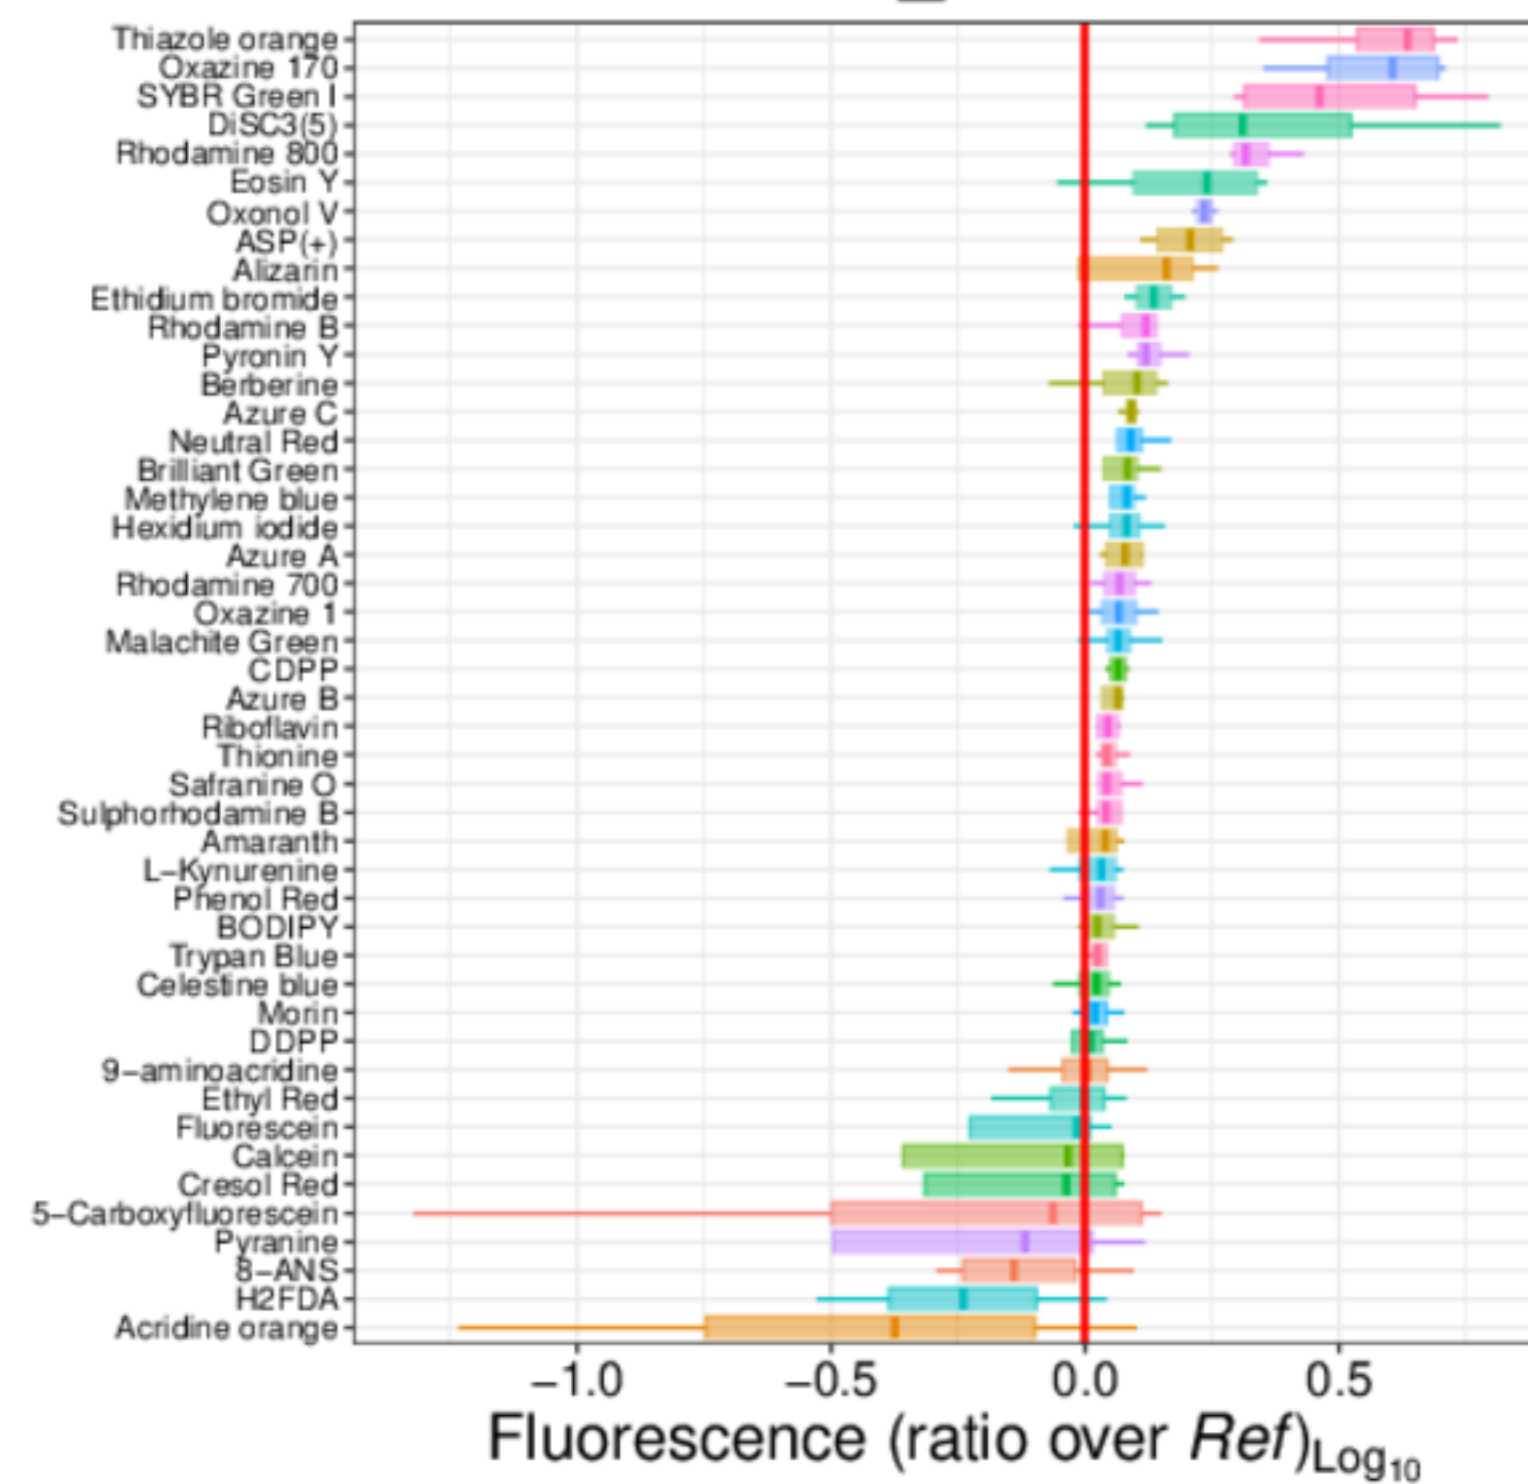

eMRef\_T3F81I2

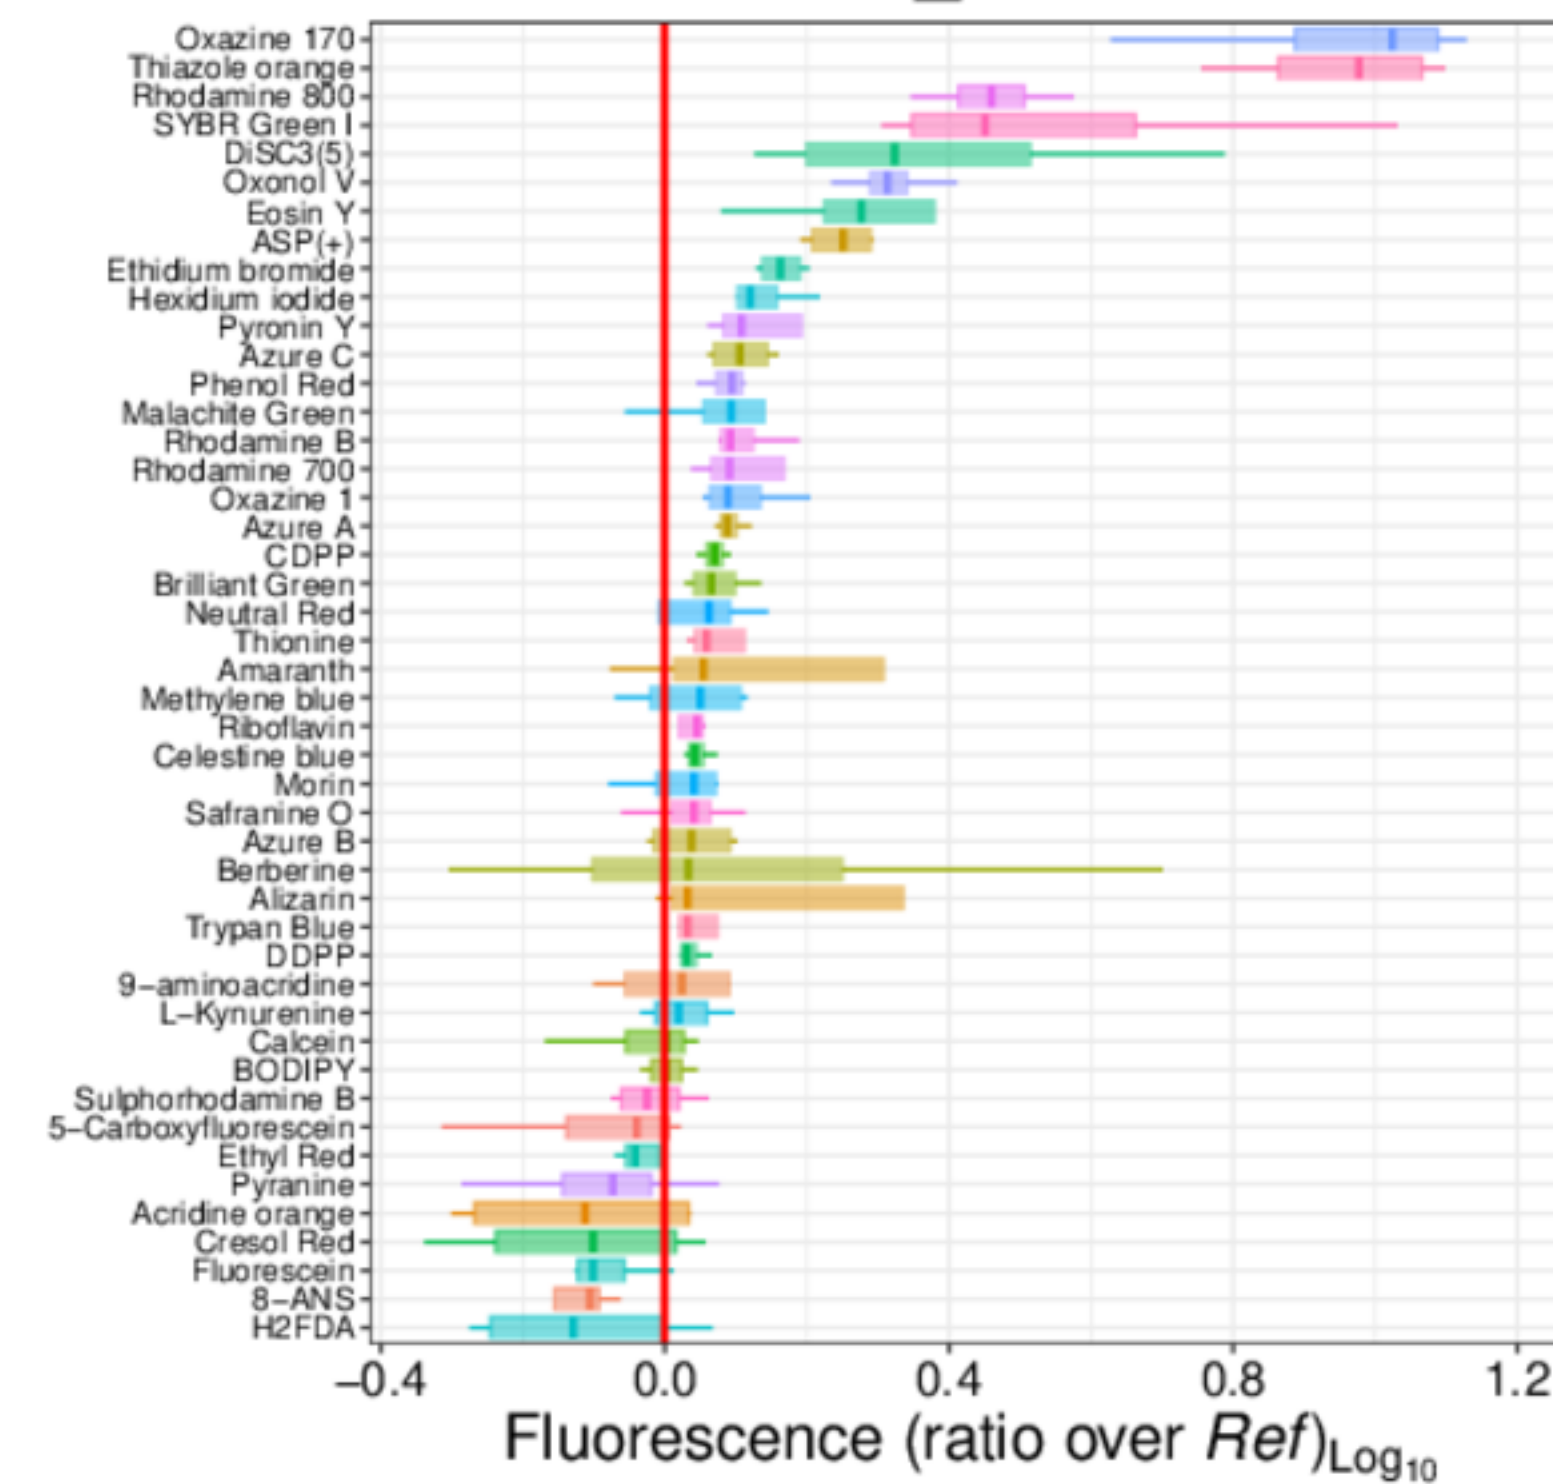

eMRef\_T4F70I1

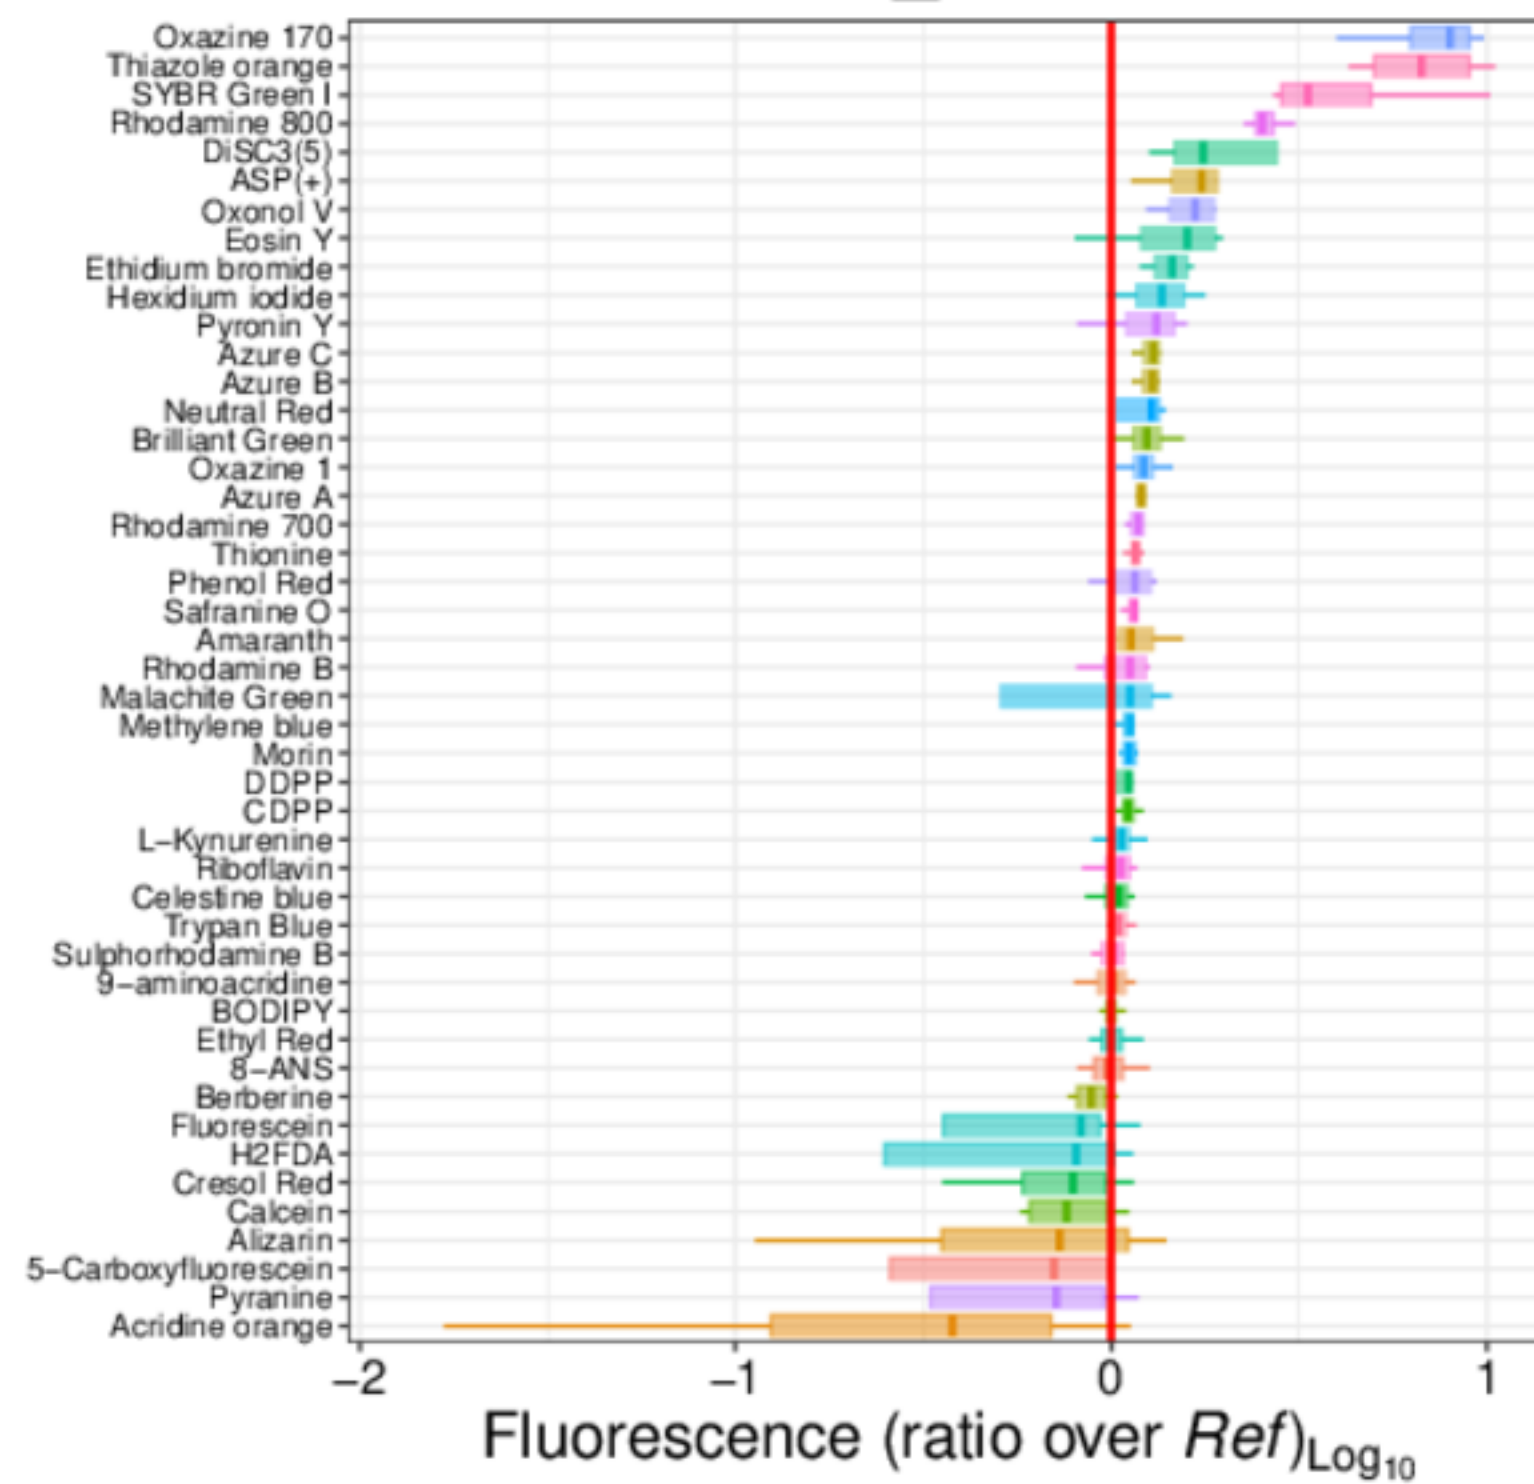

eMRef\_T4F70I2

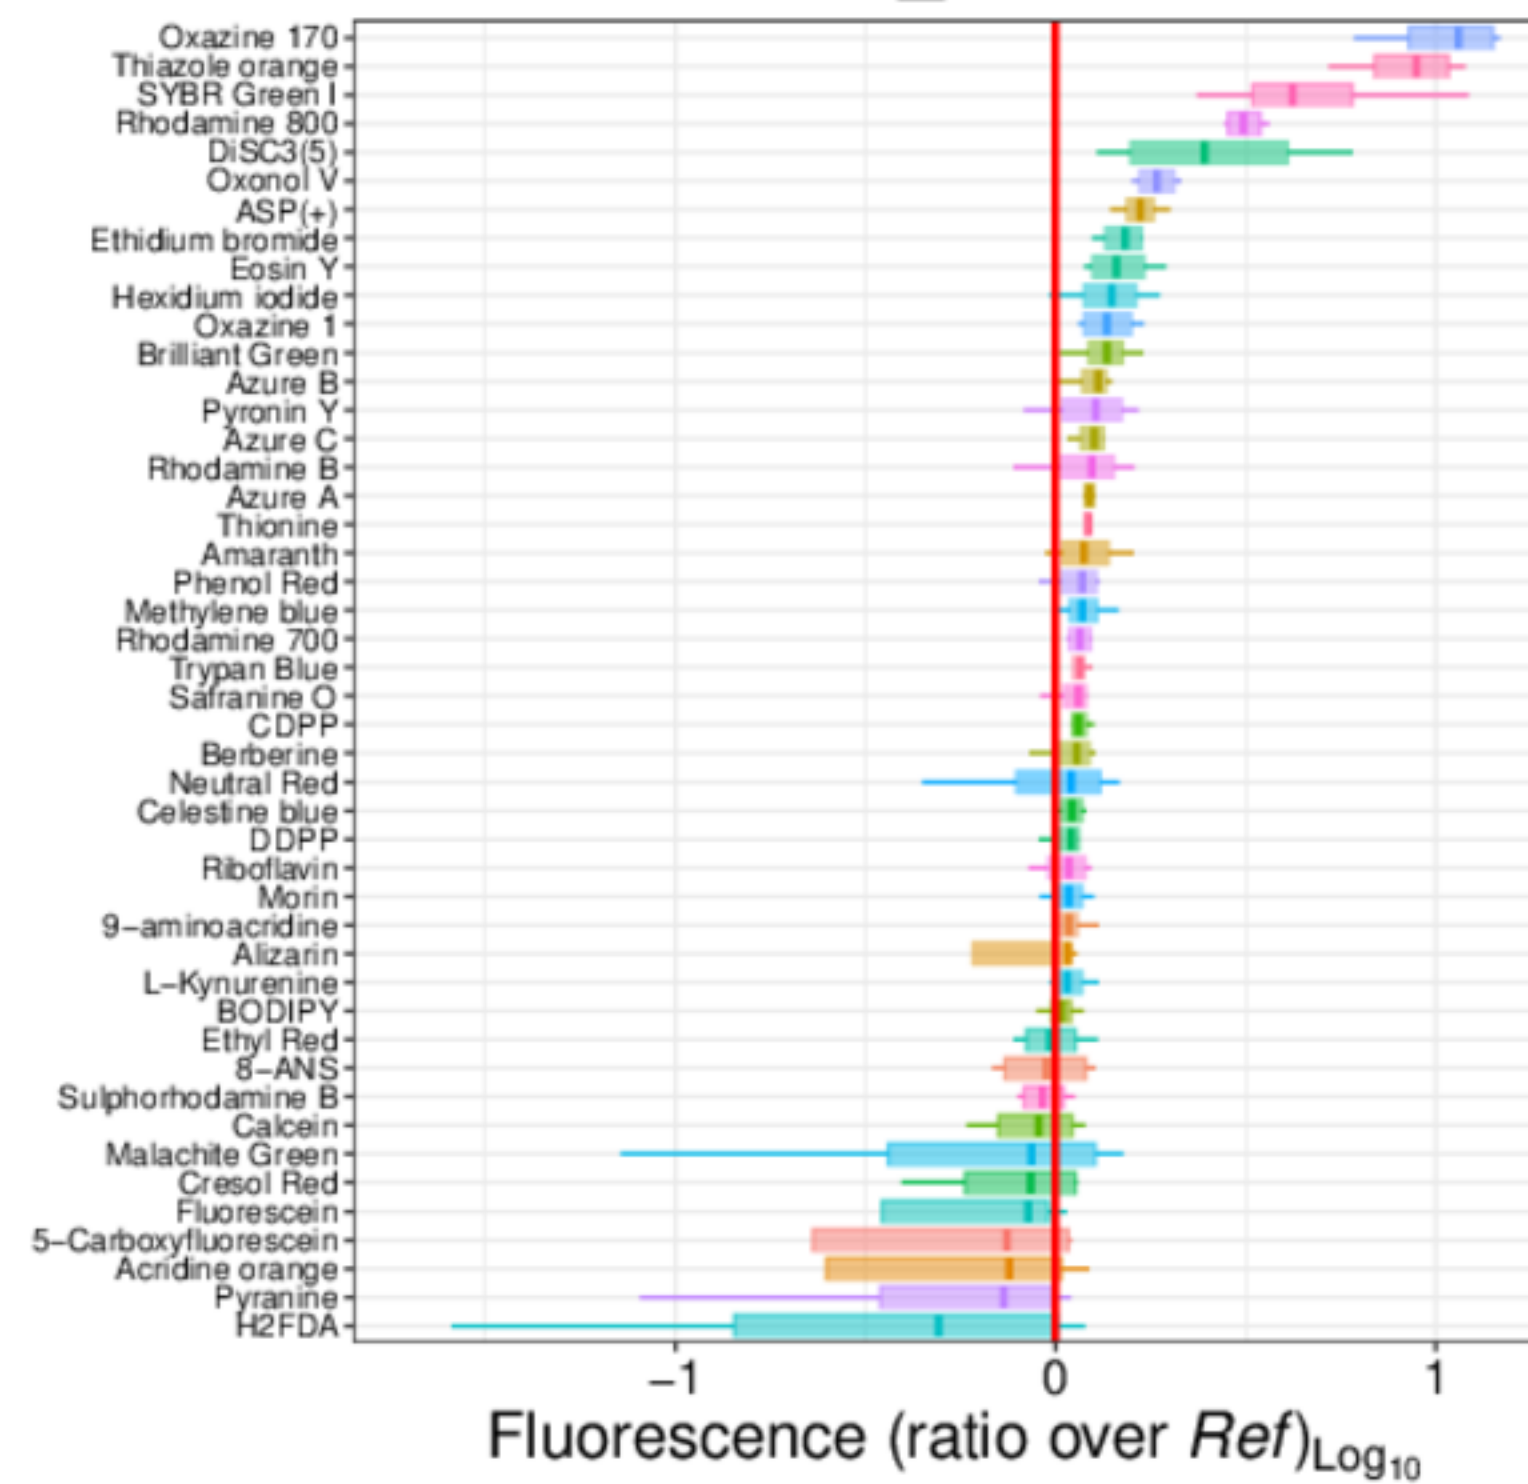

eTRef\_T1F63I1

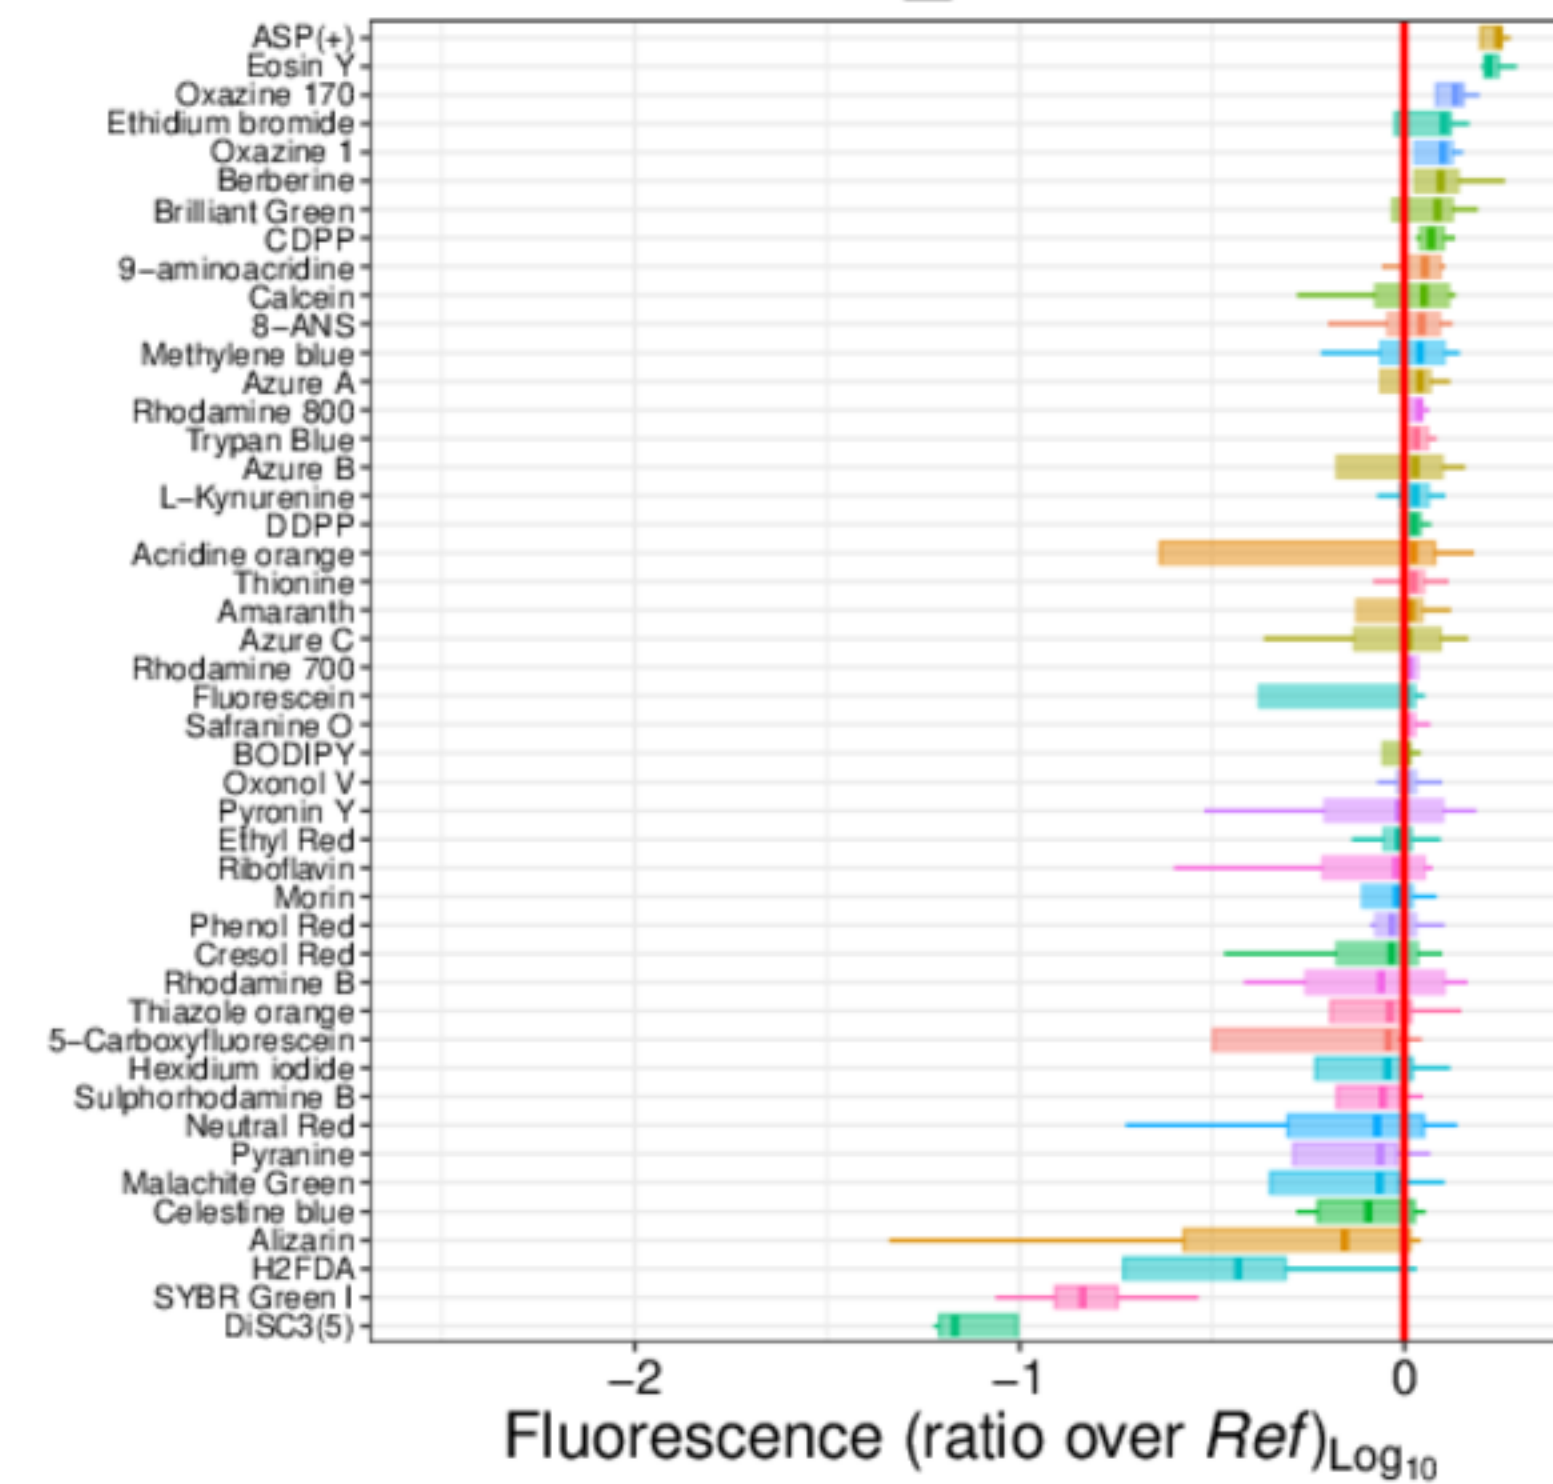



eTRef\_T1F63I2

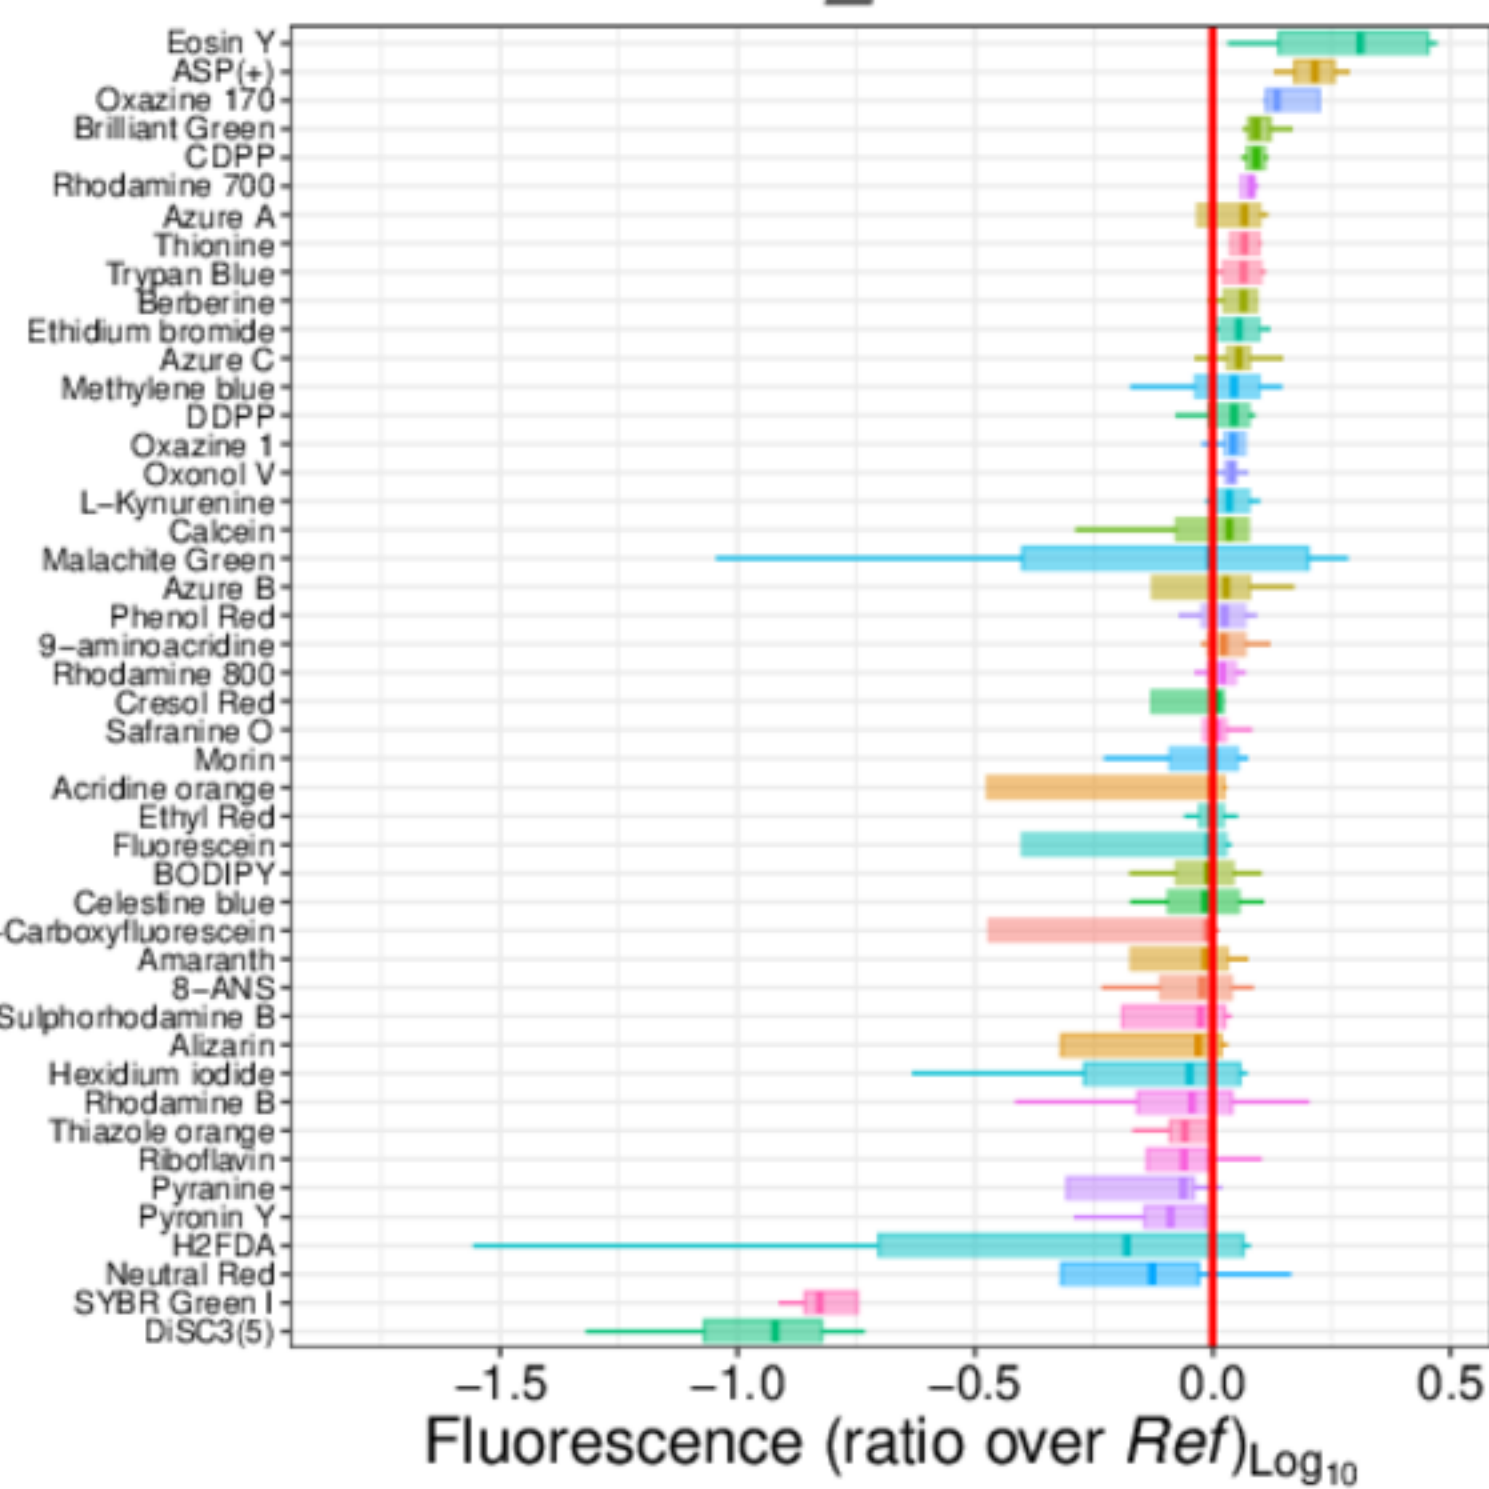

eTRef\_T2F45I1

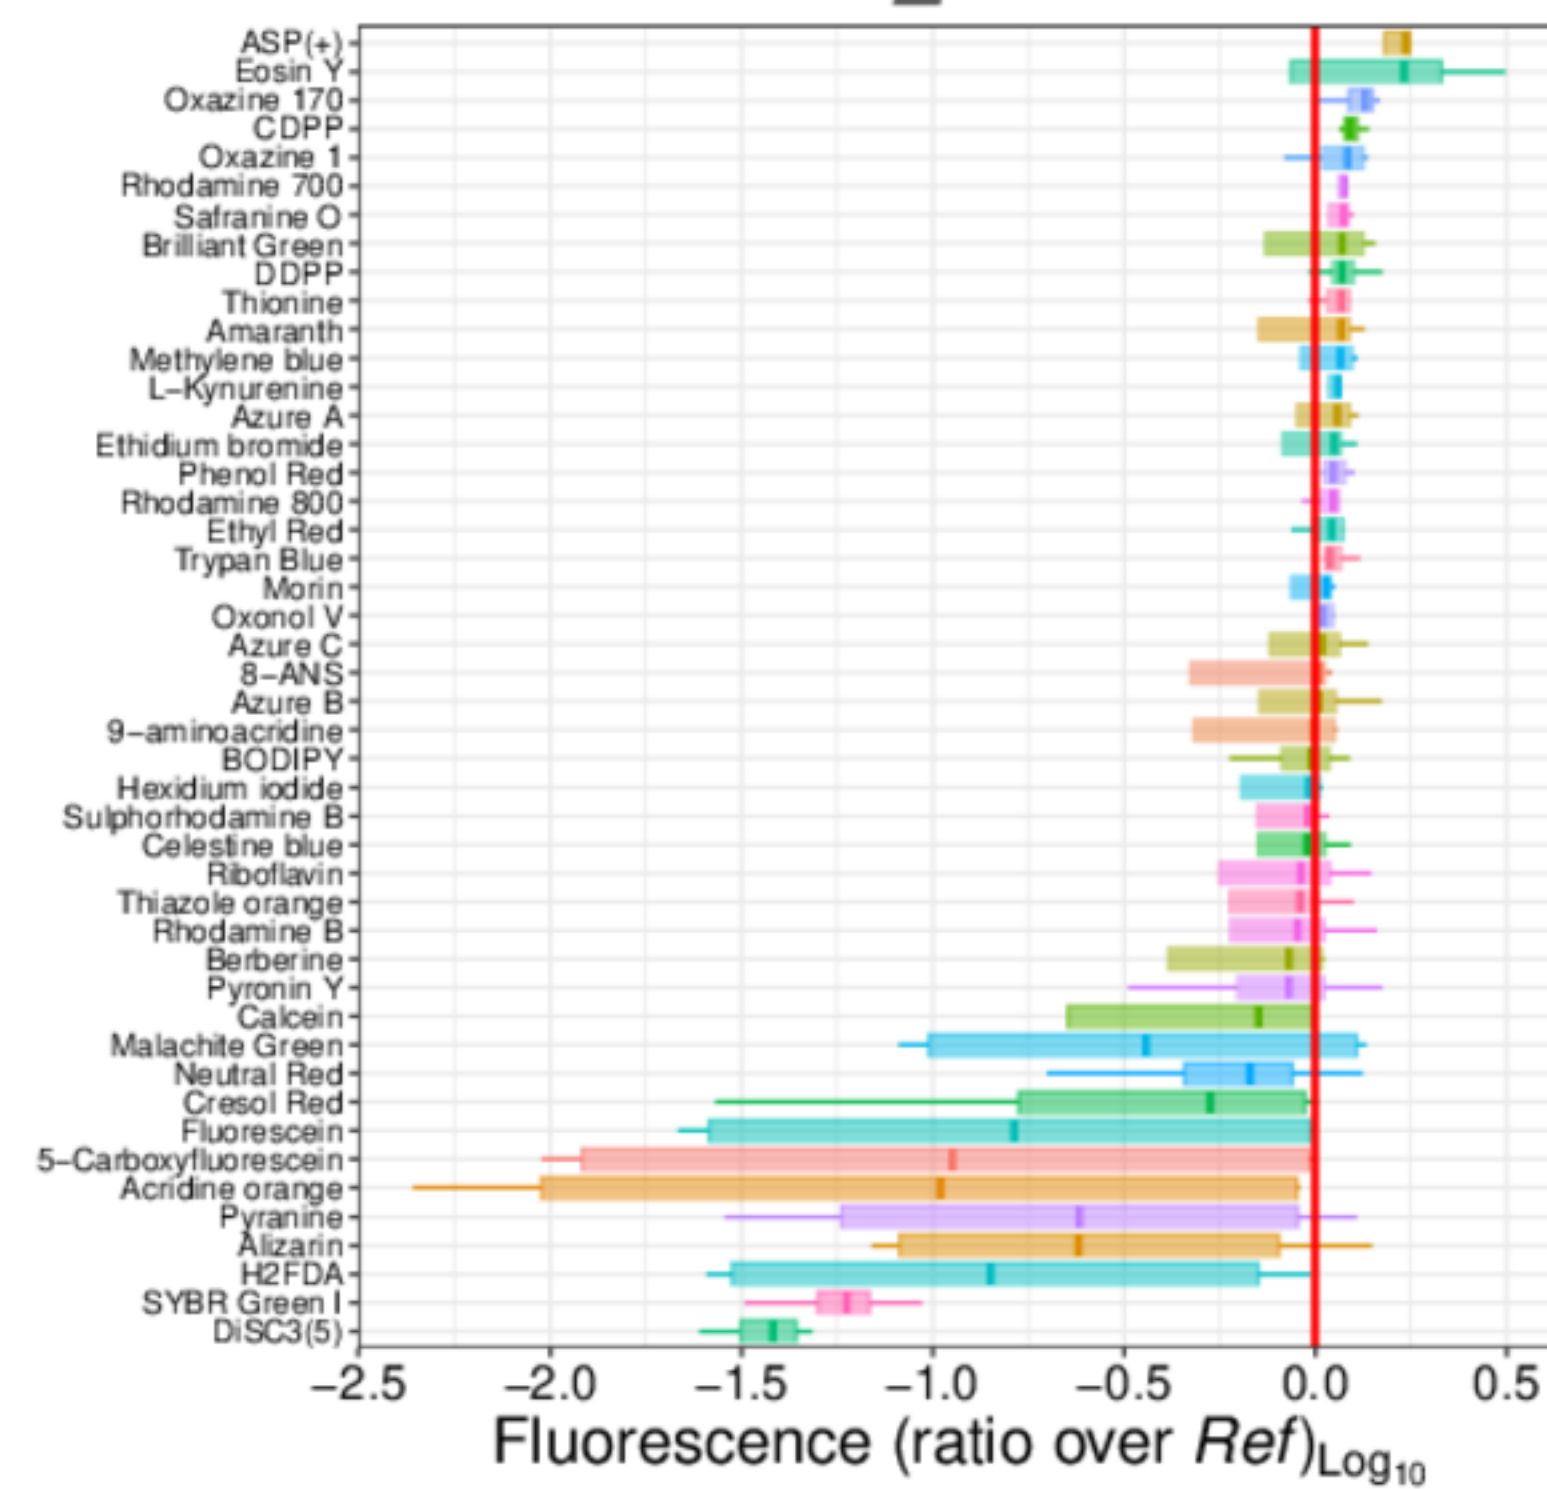

eTRef\_T2F45I2

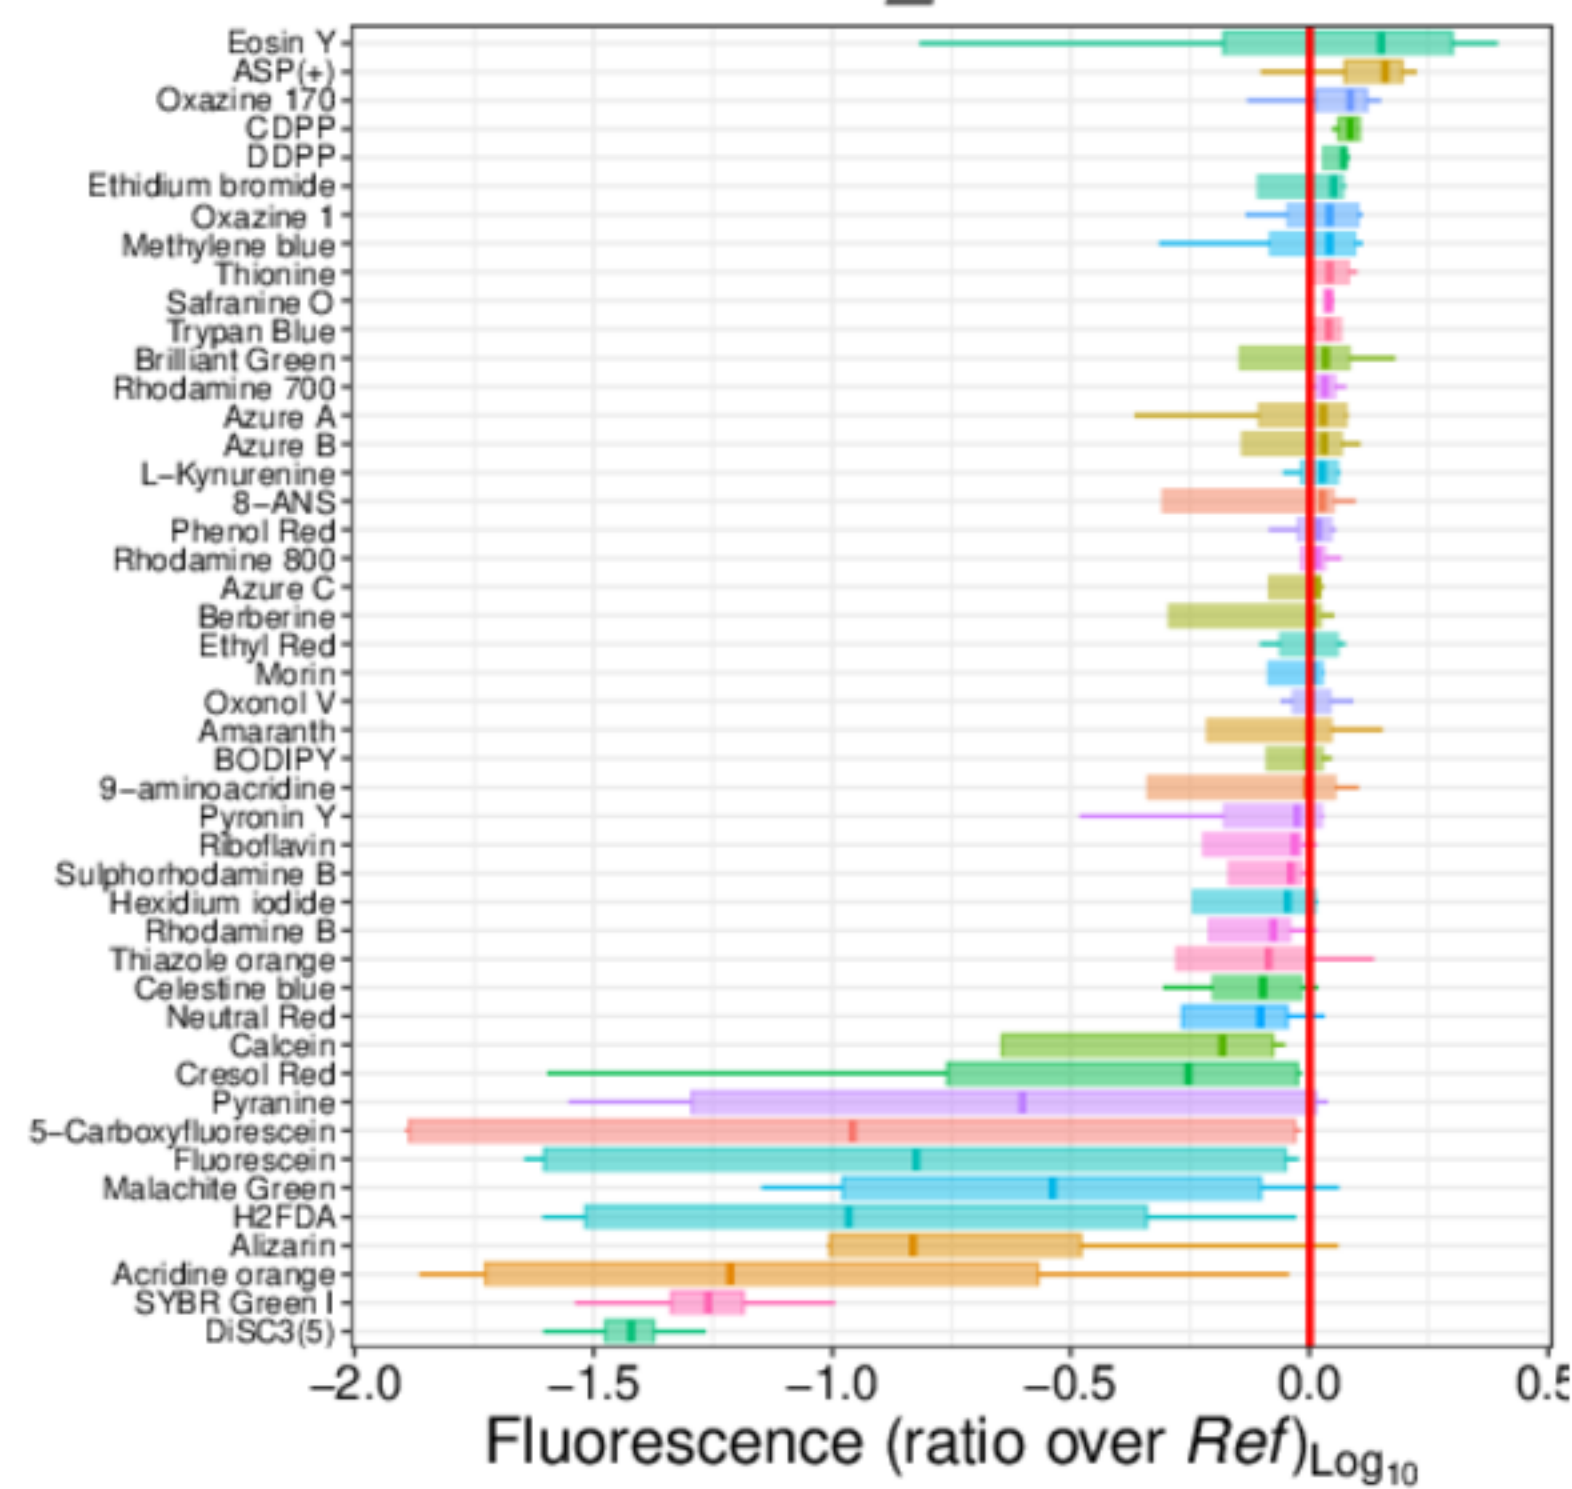

eTRef\_T3F44I1

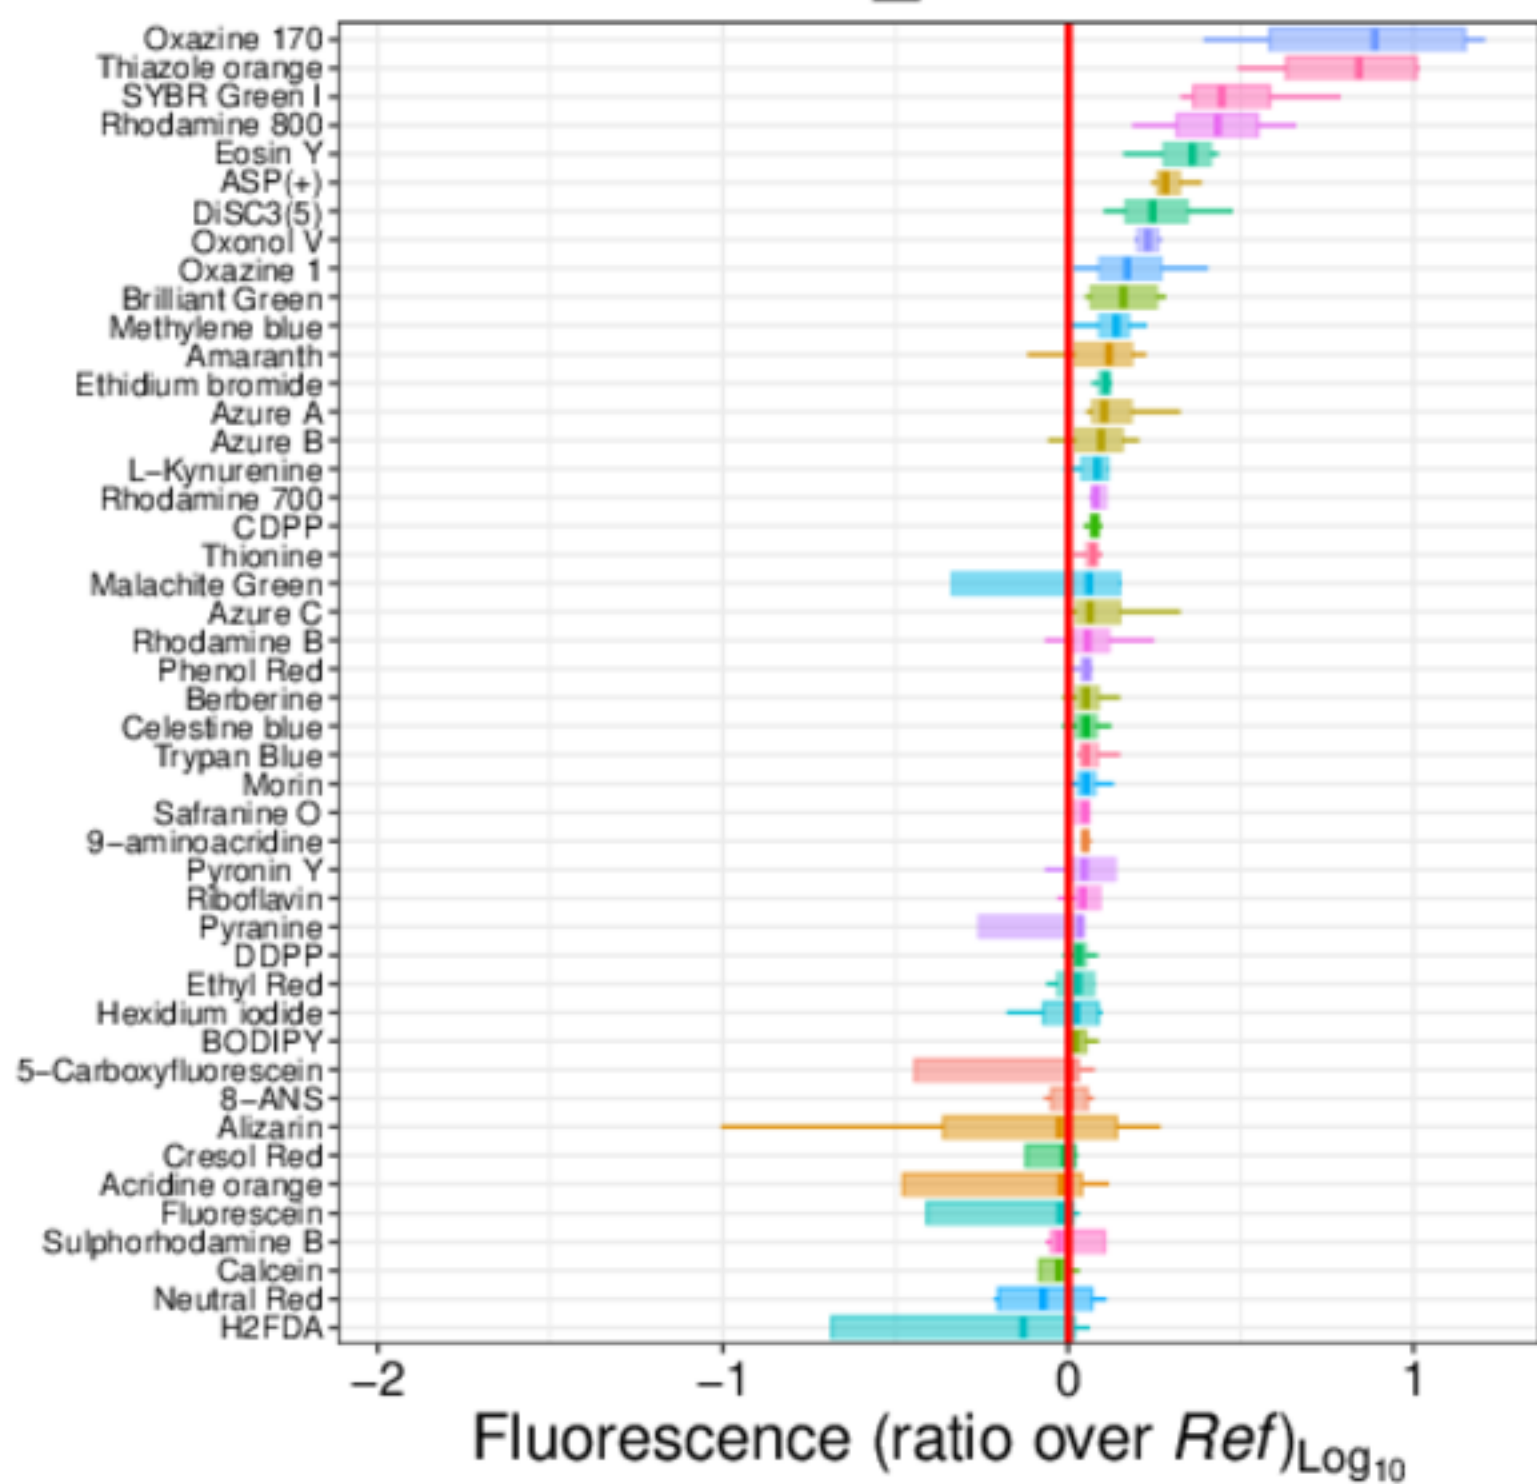

eTRef\_T3F44I2

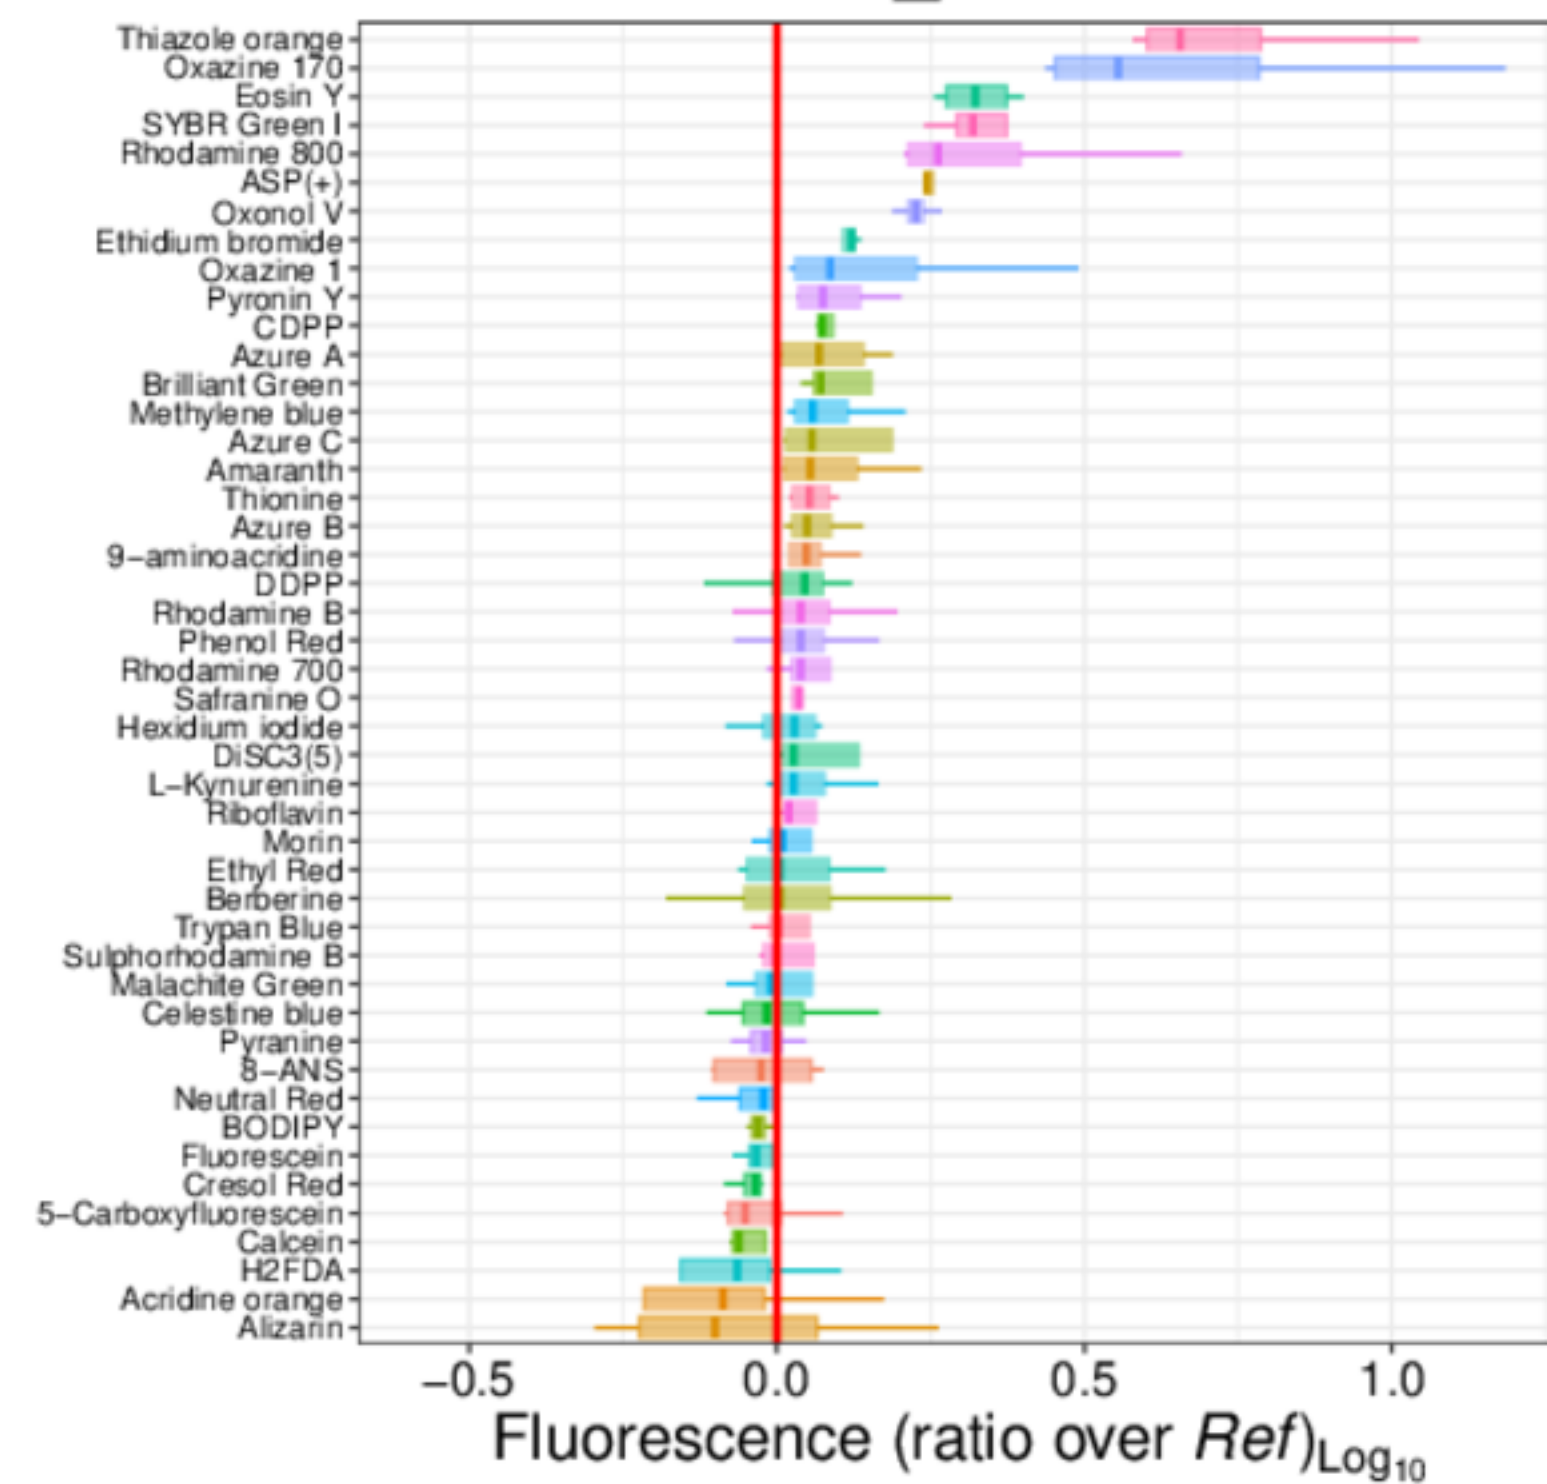

eTRef\_T4F49I1

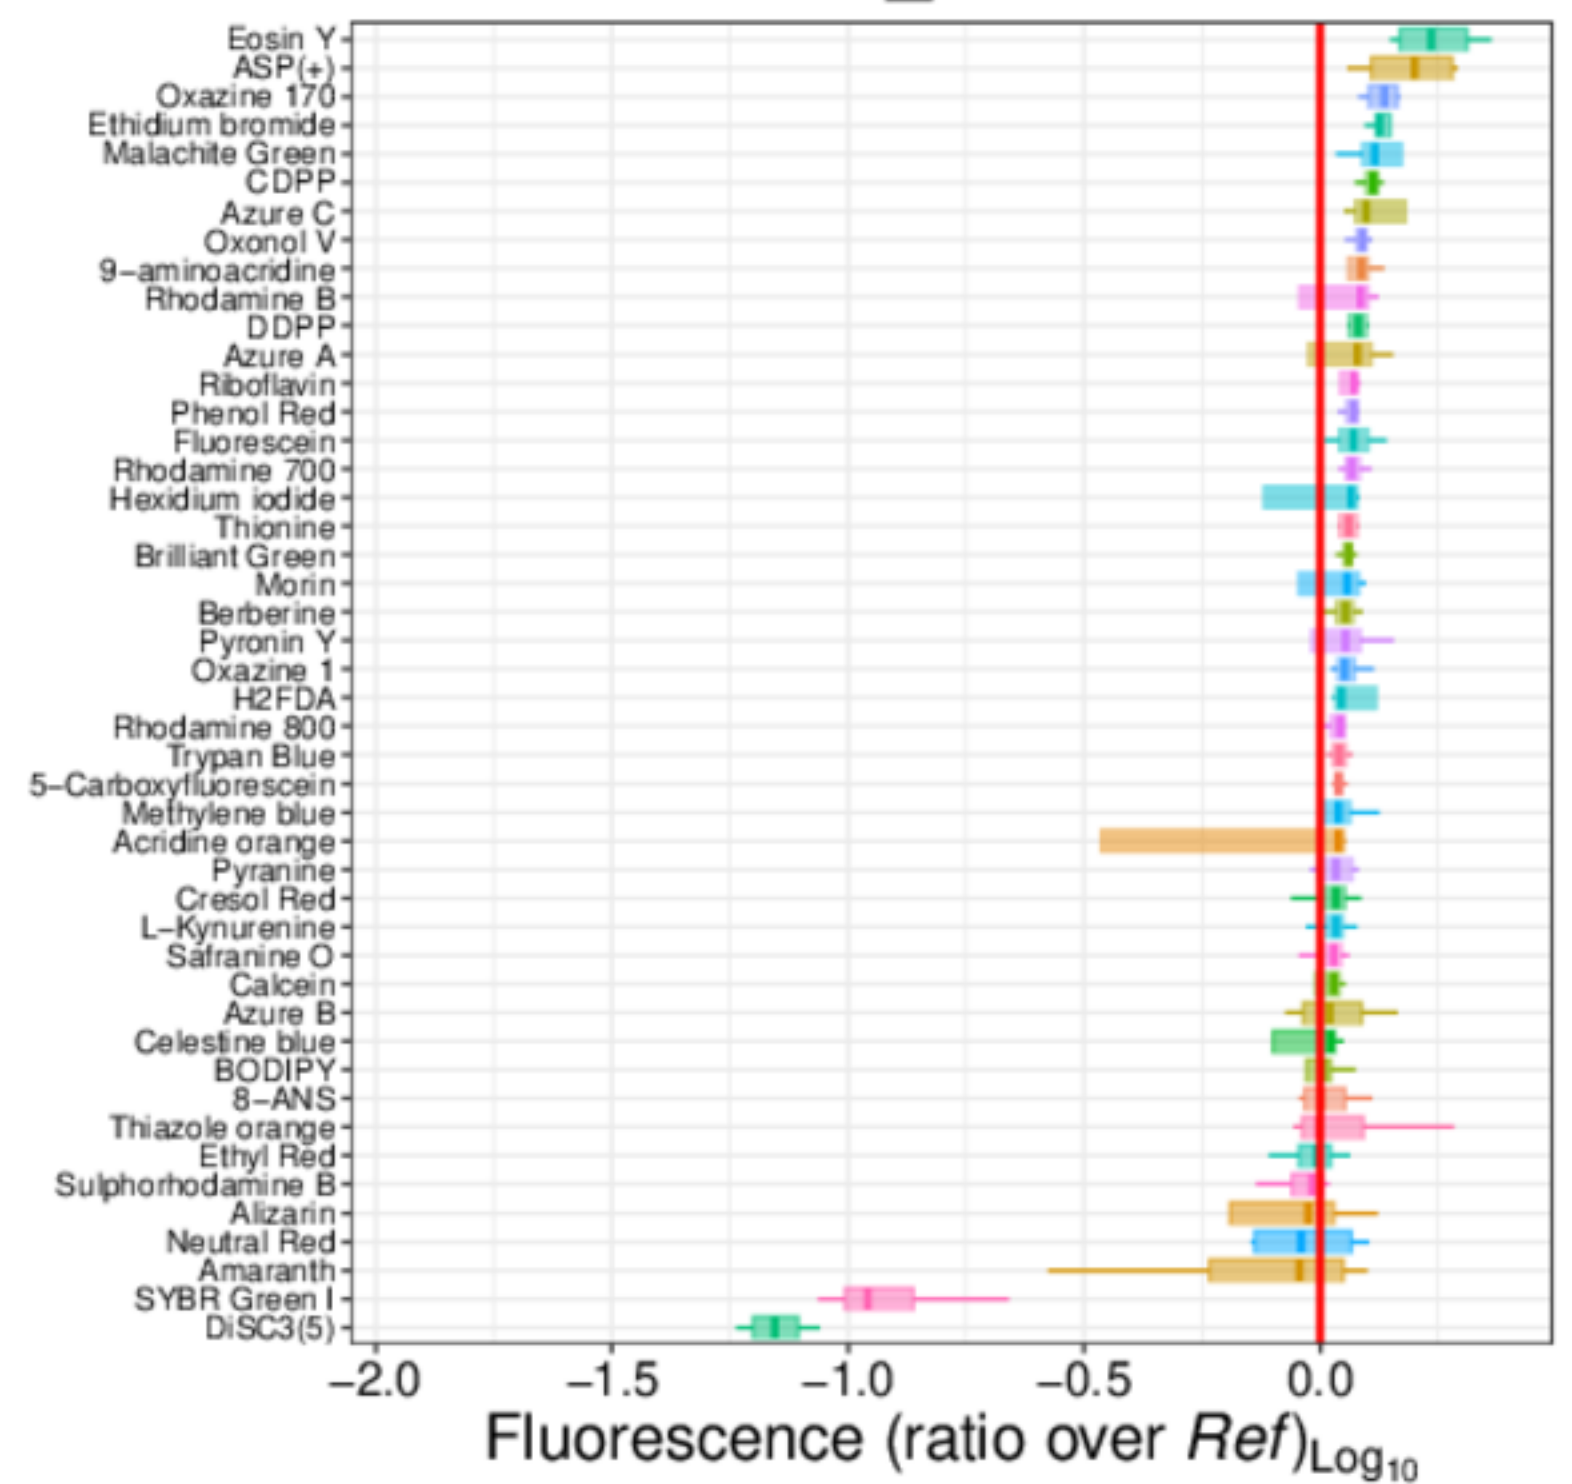

eTRef\_T4F49I2

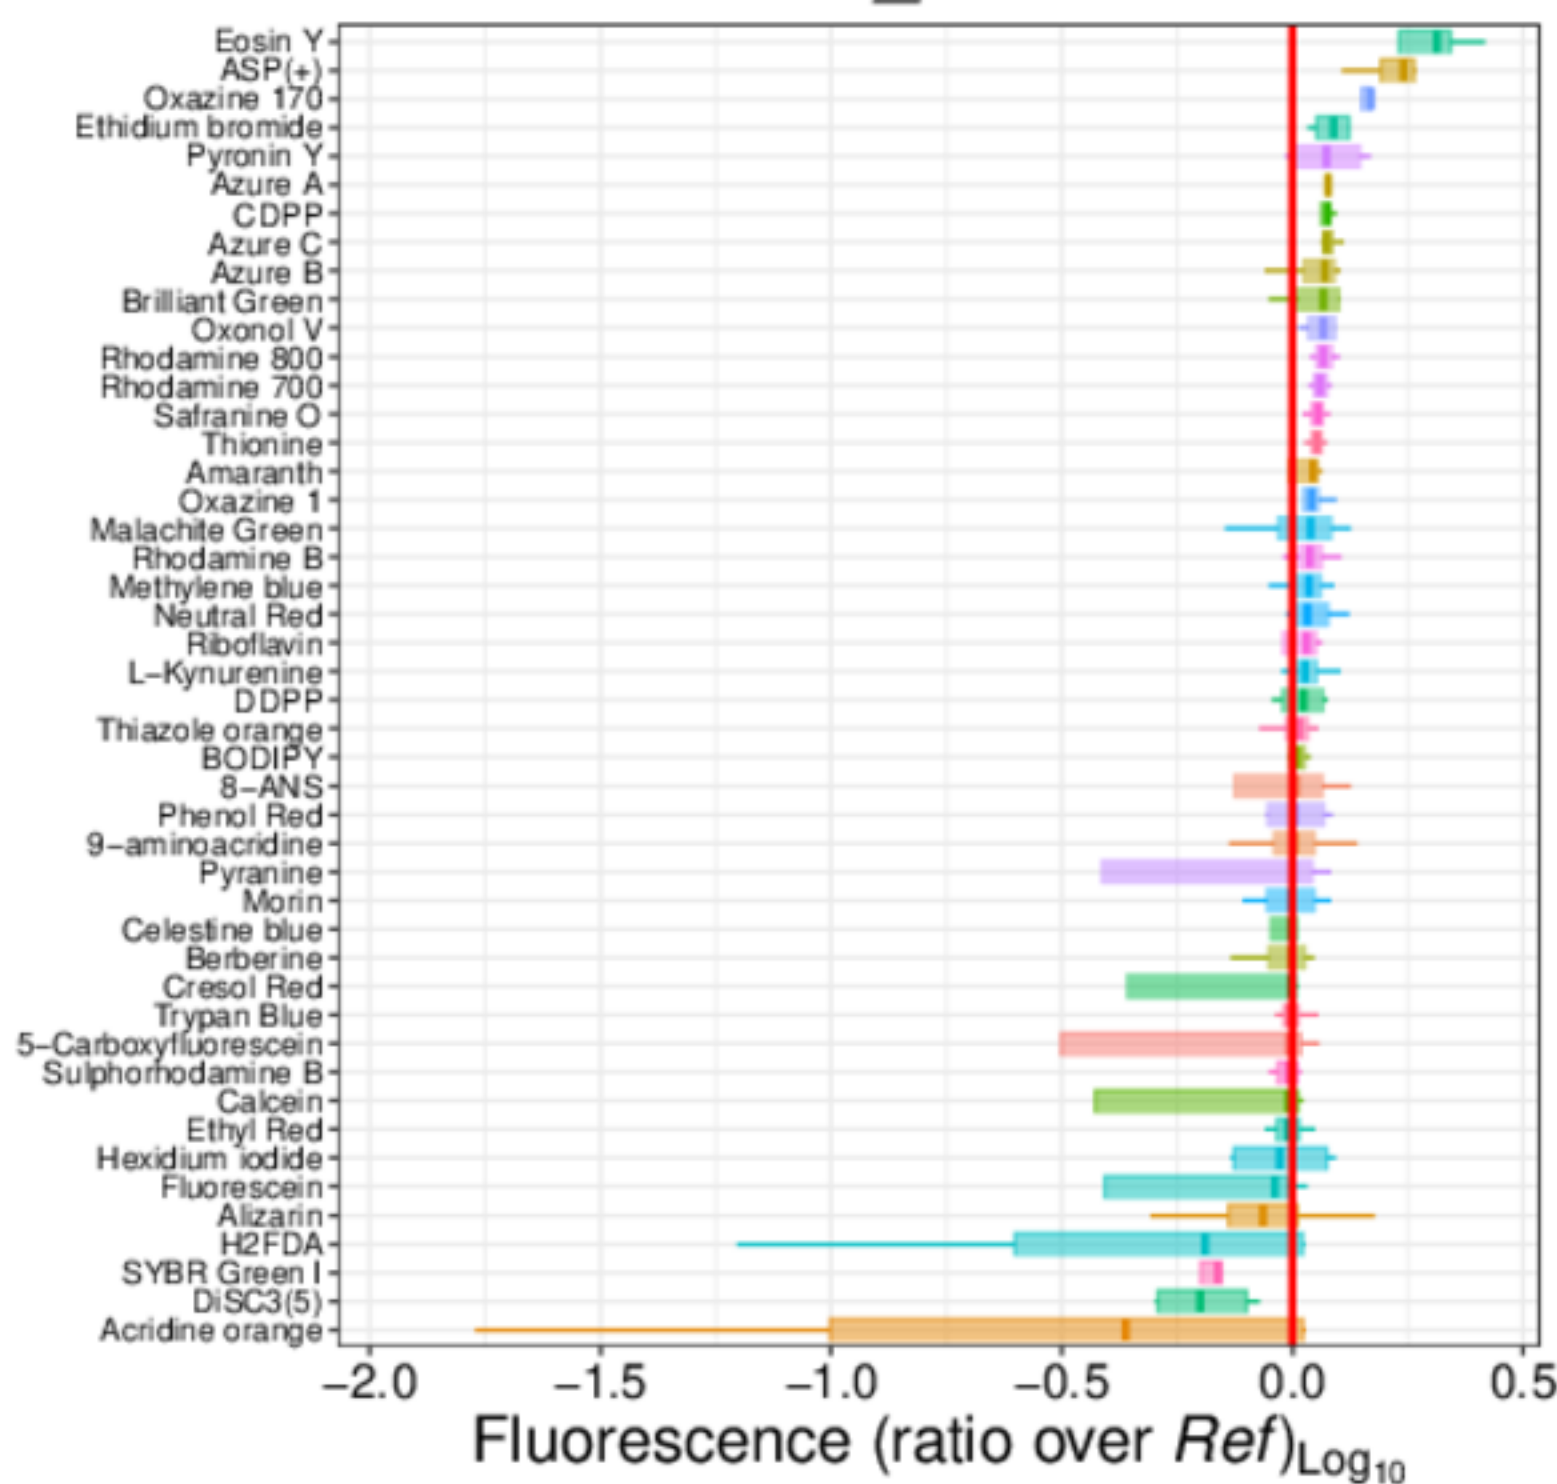

Supplement: s1 [file s1]
